# Supplementary material for: Solvent-Free Henry and Michael Reactions with Nitroalkanes Promoted by Potassium Carbonate as a Versatile Heterogeneous Catalyst
Source: Hindawi journal article supplement (doi:10.1155/2017/6267036), 2017-01-01

**Solvent-free Henry and Michael reactions with nitroalkanes promoted by potassium carbonate as a versatile heterogeneous catalyst**

Supplementary Material

Table of Contents

[4.4 Supplemental material 1](#_Toc479859242)

[4.4.1 Analytical data and spectra for β-nitroalcohols 1](#_Toc479859243)

[4.4.2 Analytical data and spectra for Michael mono-adducts 20](#_Toc479859244)

# 4.4 Supplemental material

## 4.4.1 Analytical data and spectra for β-nitroalcohols

**3. (Table 1 Entry 5). 2-nitro-3-hexanol.** Translucent Liquid; IR (neat): νmax 3421, 2962, 2933, 2875, 2852, 1552, 1720 cm-1; 1H NMR (250 MHz, CDCl3) δ 0.92-1.0 (t, 3H), δ 1.31-1.66 (m, 7H), δ 2.14-2.19 (dd, *J* = 6.71 Hz, *J* = 4.88 Hz, 1H), δ 3.87-3.98 (m, 0.5H), δ 4.16-4.25 (m, 0.5H), δ 4.46-4.61 (m, 1H).


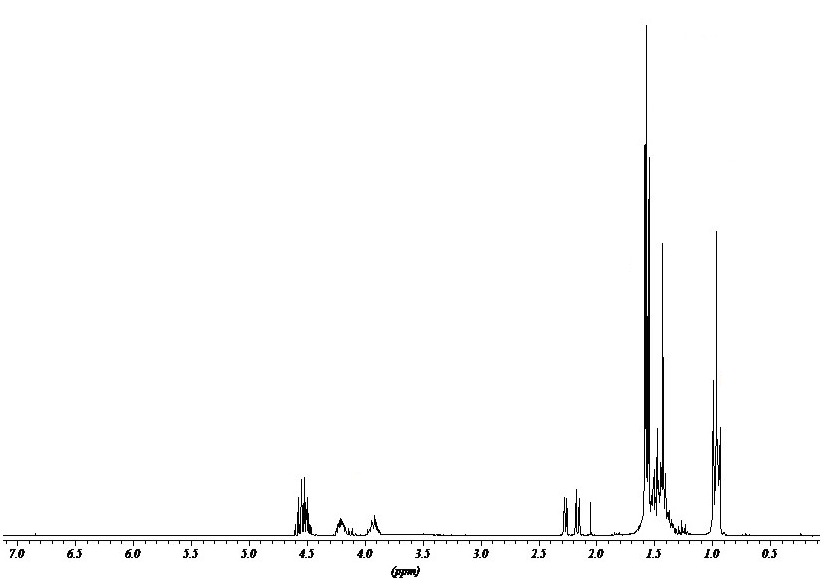


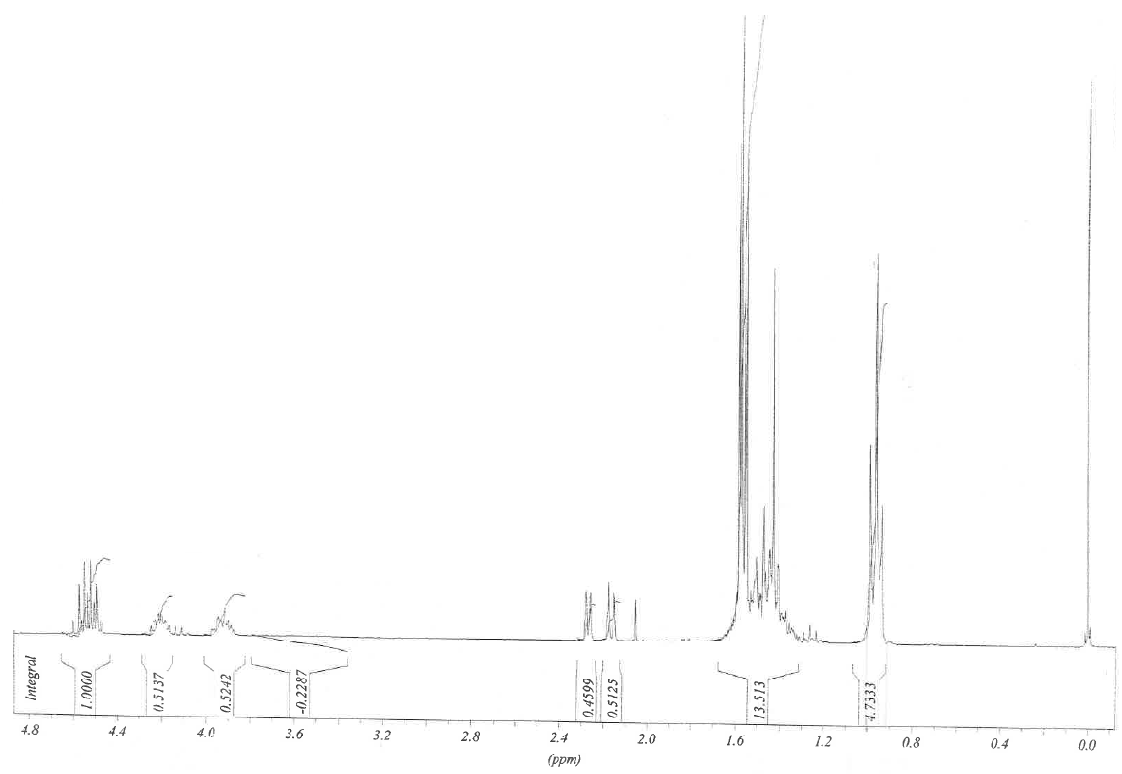


**3b. 2-methyl-2-nitro-3-hexanol.** Translucent Liquid, IR (neat): νmax 3438, 2973, 2938, 2860, 1548, 1721 cm-1; 1H NMR (250 MHz, CDCl3) δ 0.90-1.01 (t, J = 7.33 Hz, 3H), 1.20-1.50 (m, 3H), 1.52-1.75 (m, 7H), 2.17-2.27 (d, 1H, J = 6.71 Hz), 3.95-4.10 (m, 1H). 13C NMR (62.9 MHz, CDCl3) δ 92.3, 75.8, 33.6, 23.7, 20.3, 19.6, 13.8.


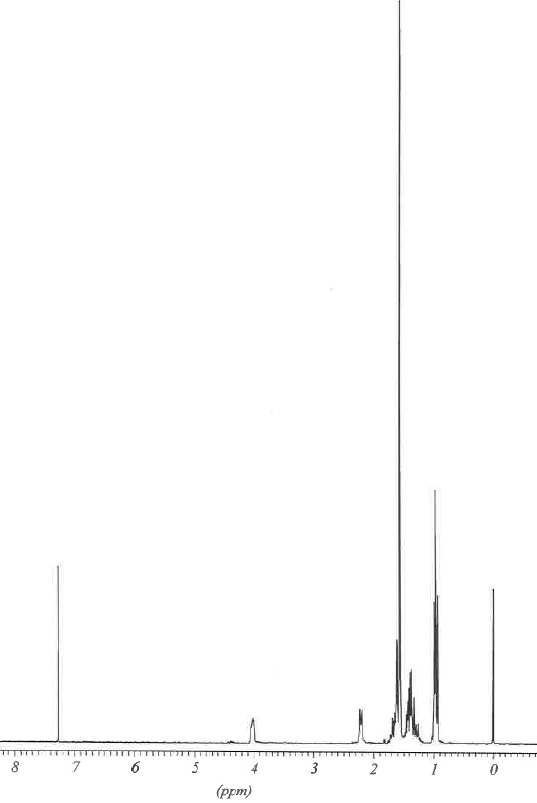


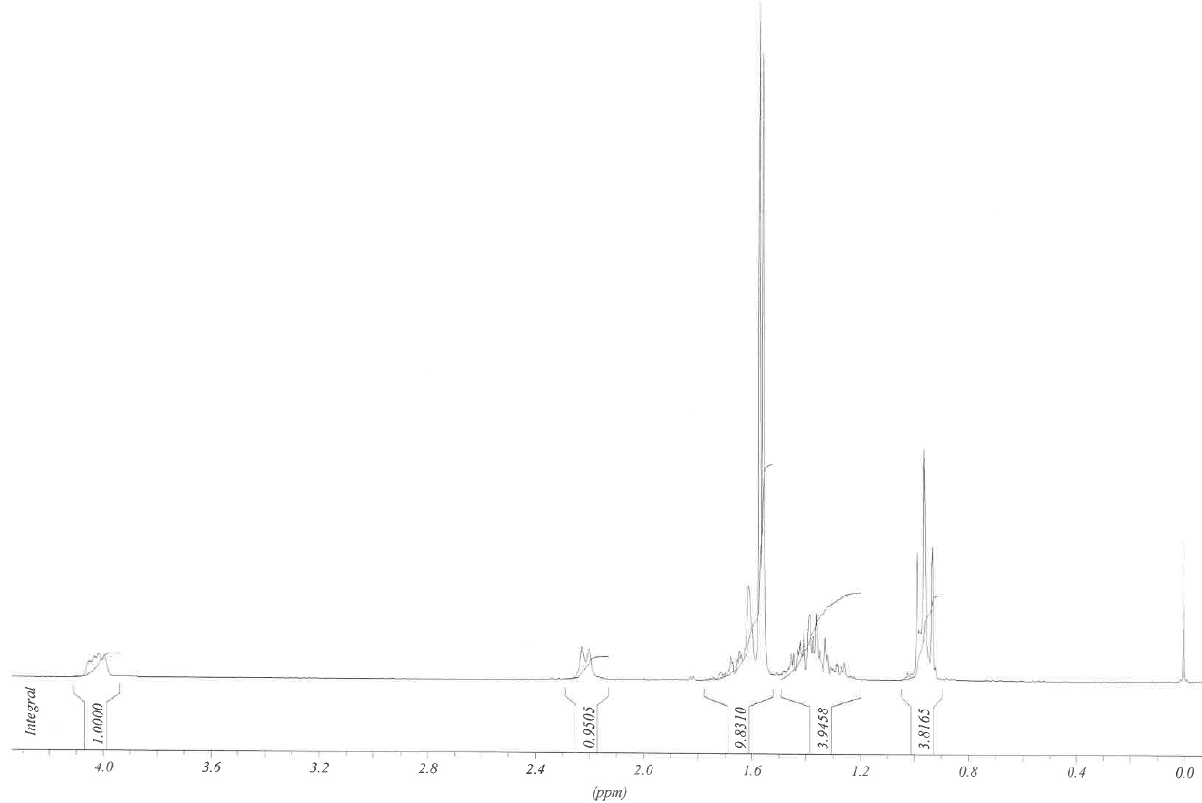


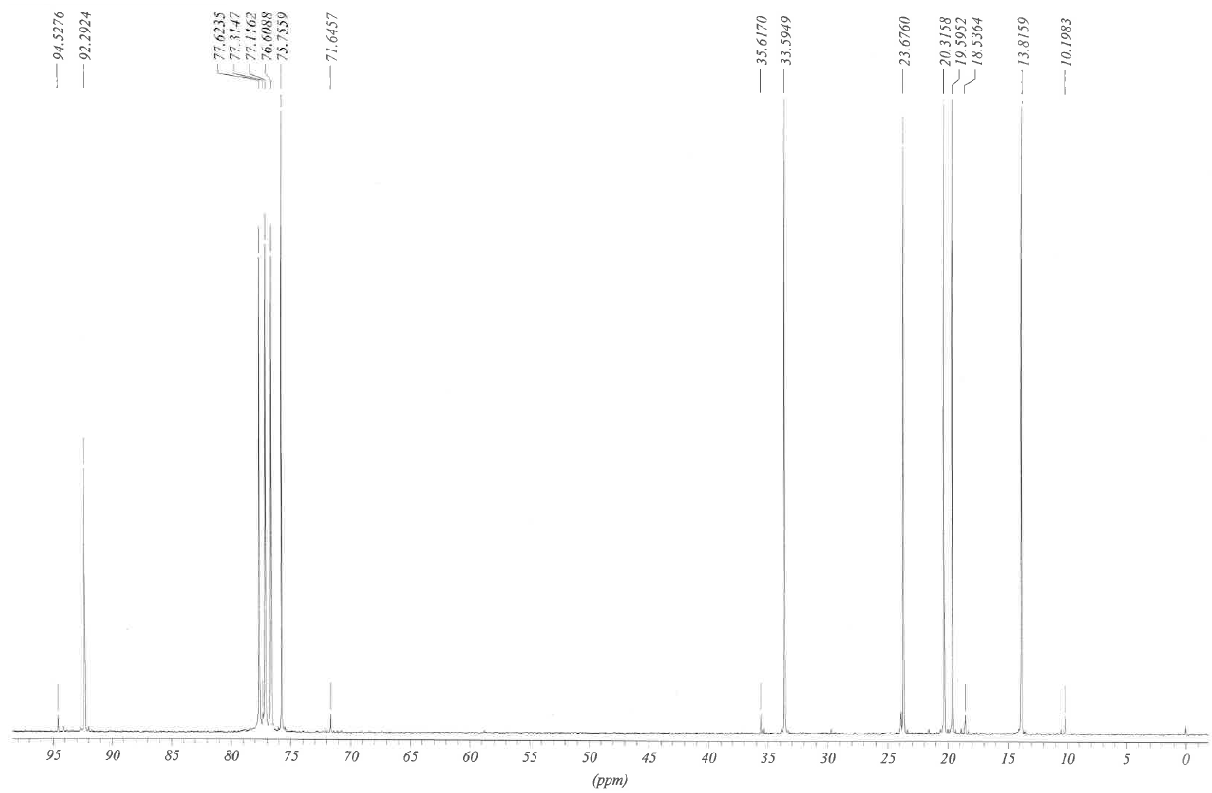


**3c. 1-nitro-2-propanol.** Translucent Liquid; IR (neat): νmax 3412, 2981, 2937, 1556, 1708 cm-1; 1H NMR (250 MHz, CDCl3) δ 1.28-1.34 (d, J = 6.71 Hz, 3H), δ 2.57-2.64 (d, J = 6.71 Hz, 1H), δ 4.37-4.42 (m, 2H) δ 4.45-4.60 (m, 1H).


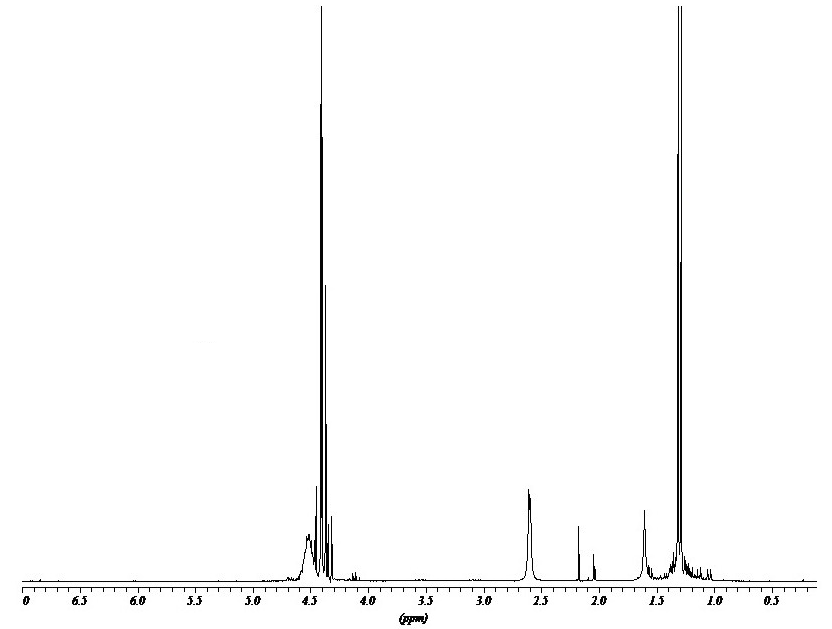


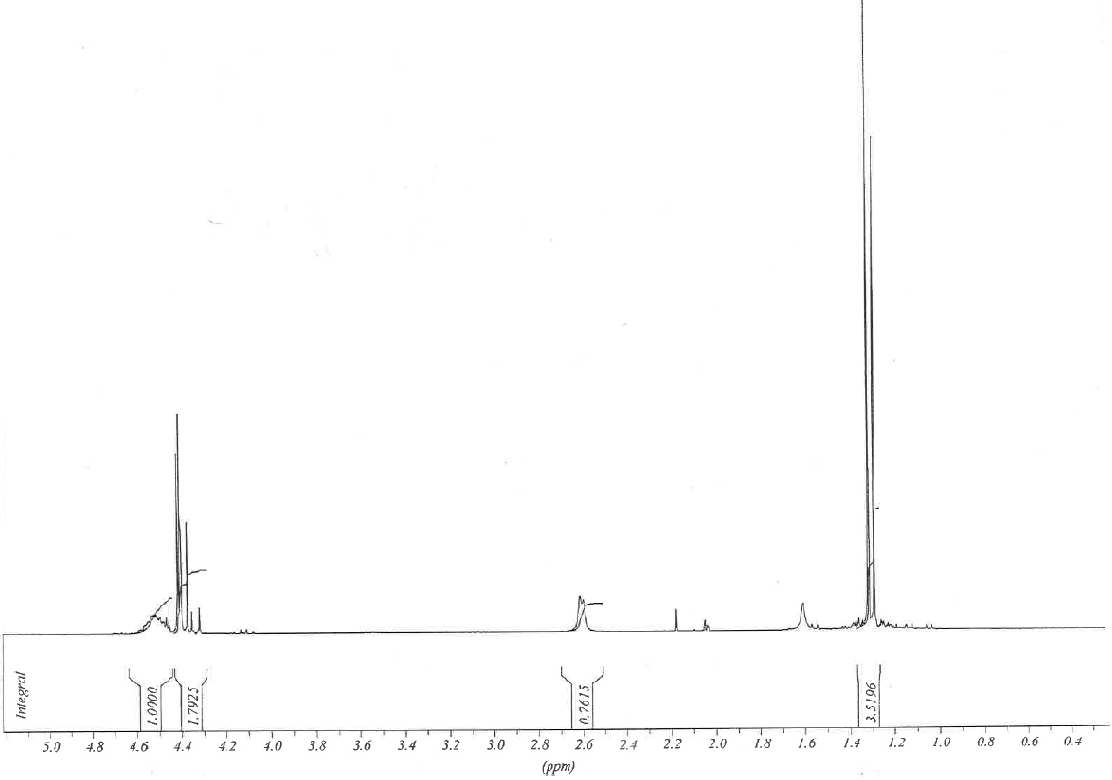


**3d. 2-nitro-1-phenyl-1-propanol.** Translucent Liquid; IR (neat): νmax 3527, 2995, 2943, 2902, 1548, 3064, 3034, 1700 cm-1; 1H NMR (250 MHz, CDCl3) δ 1.35-1.52 (2d, J = 6.71 Hz, J = 7.32 Hz, 3H), δ 2.51 (2d, J = 4.27 Hz, J = 3.05 Hz, 1H), δ 4.66-4.84 (m, 1H), δ 5.05 (2d, J = 9.16 Hz, 1H), δ 7.3-7.5 (m, 5H).


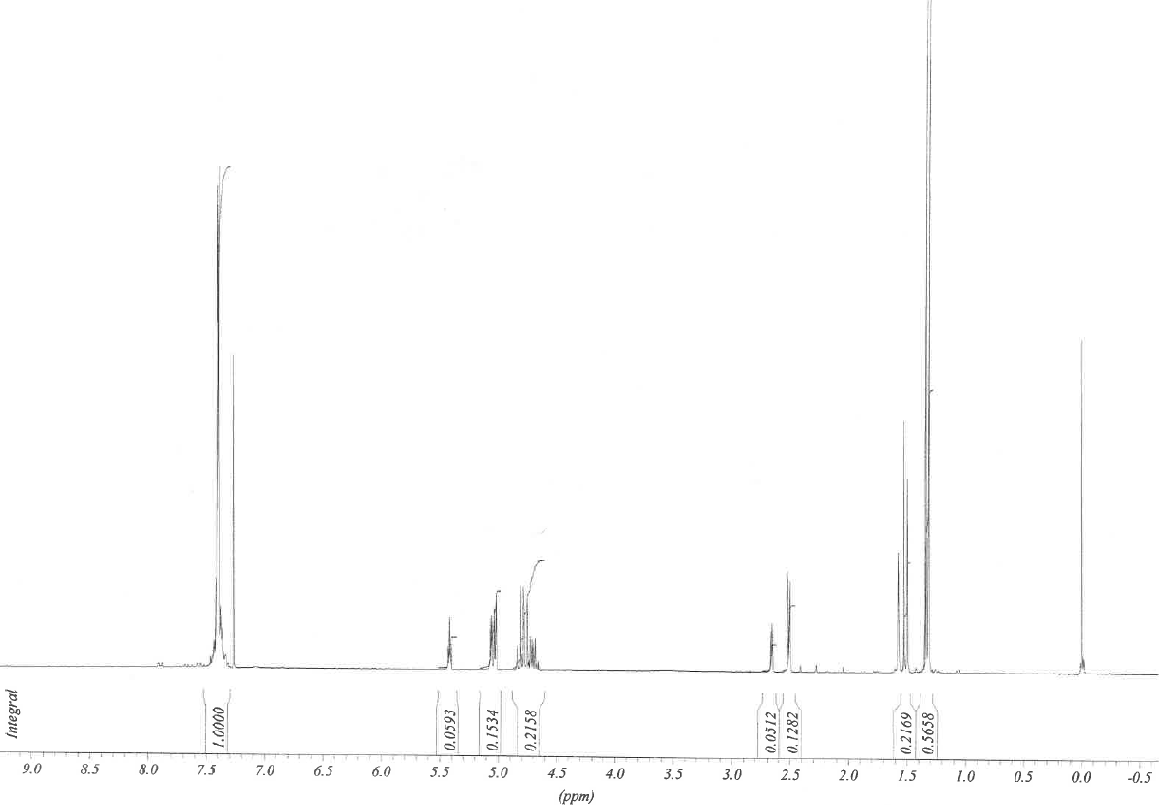


**3e. 3-methyl-3-nitro-2-butanol.** Translucent Liquid; IR (neat): νmax 3433, 2987, 2945, 2881, 1544, 1718 cm-1; 1H NMR (250 MHz, CDCl3) δ 1.20-1.25 (d, J = 6.72 Hz, 3H), δ 1.55-1.59 (d, J = 5.5 Hz, 6H), δ 2.29-2.36 (d, J = 5.5 Hz, 1H), δ 4.20-4.30 (m, J = 6.1 Hz, 1H). 13C NMR (62.9 MHz, CDCl3) δ 92.3, 71.9, 23.7, 19.9, 17.8.


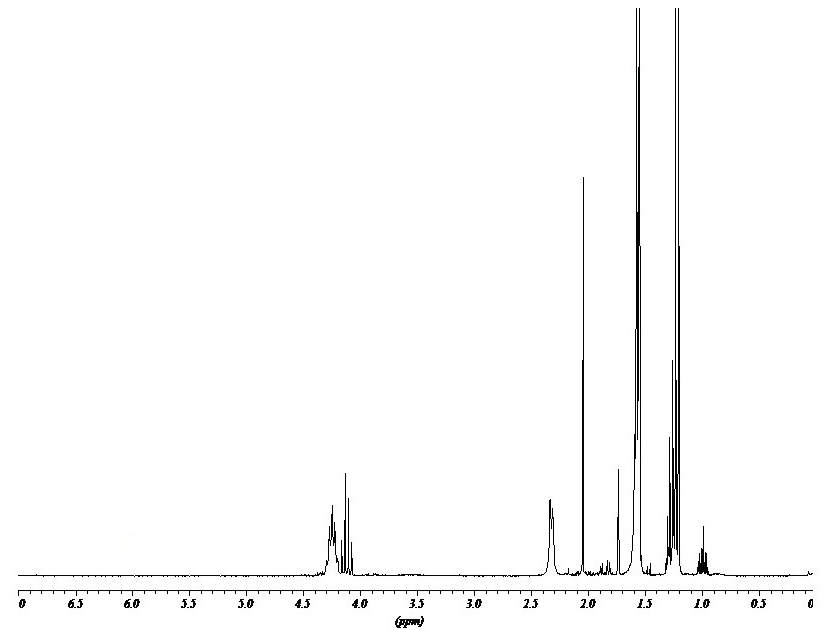


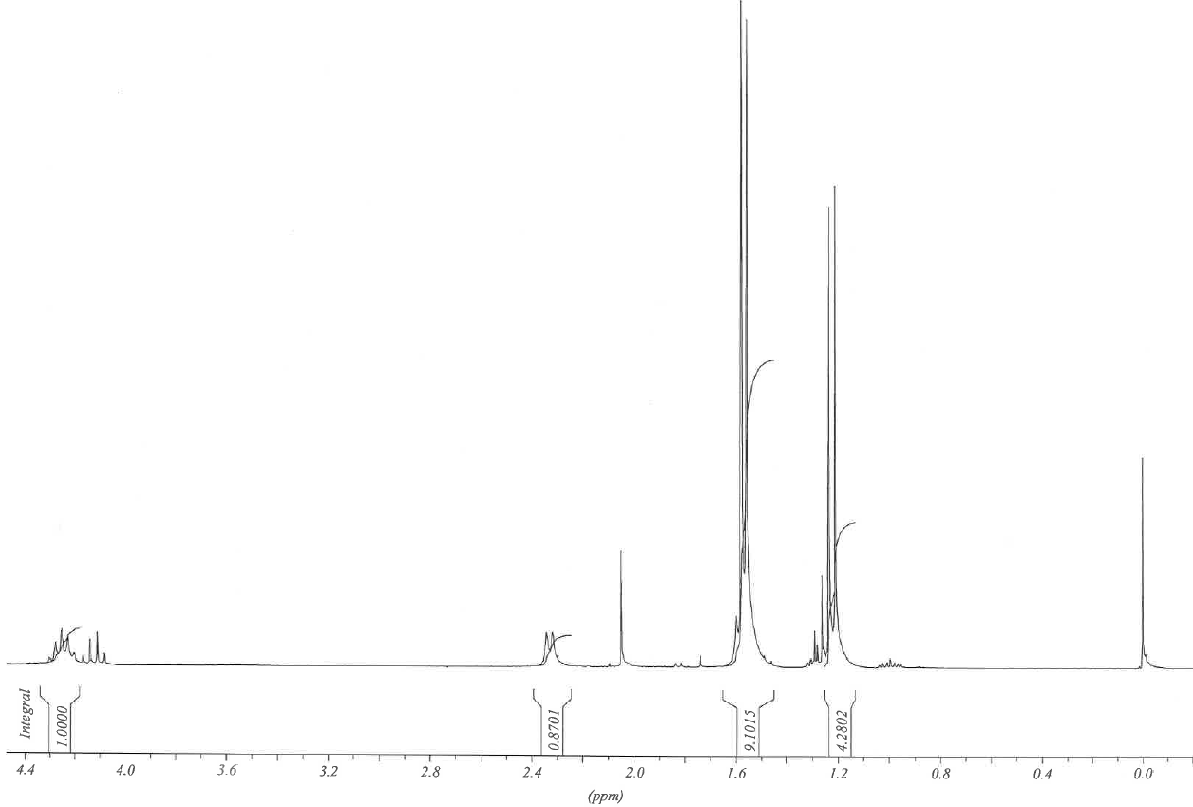


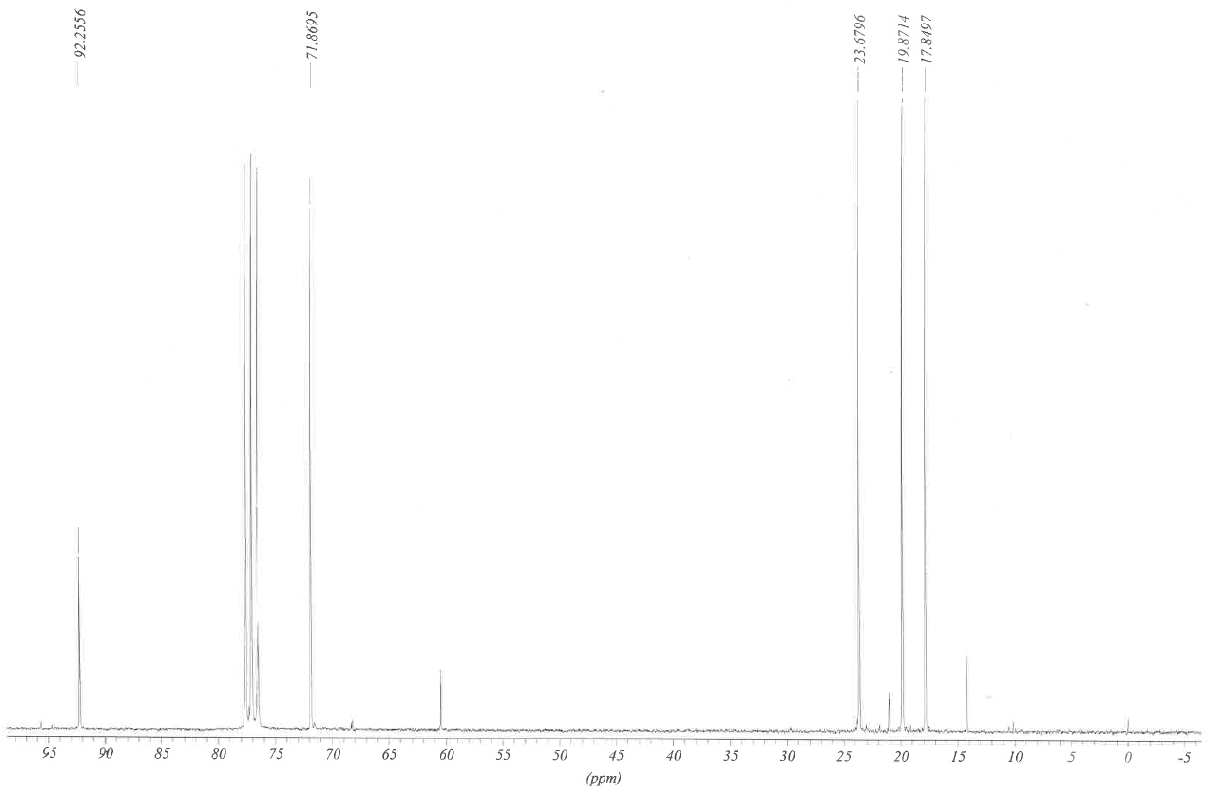


**3f. 3-nitro-1-phenyl-2-pentanol.** Translucent Liquid; IR (neat): νmax 3421, 2976, 2937, 2881, 1548, 3086, 3062, 3030, 1707 cm-1; 1H NMR (250 MHz, CDCl3) δ 0.95-1.06 (dt, J = 7.33 Hz, 3H), δ 1.85-2.26 (m, 2H), δ 2.71-2.94 (m, 3H), δ 4.07-4.30 (m, 1H), δ 4.37-4.47 (m, 1H), δ 7.18-7.46 (m, 5H).


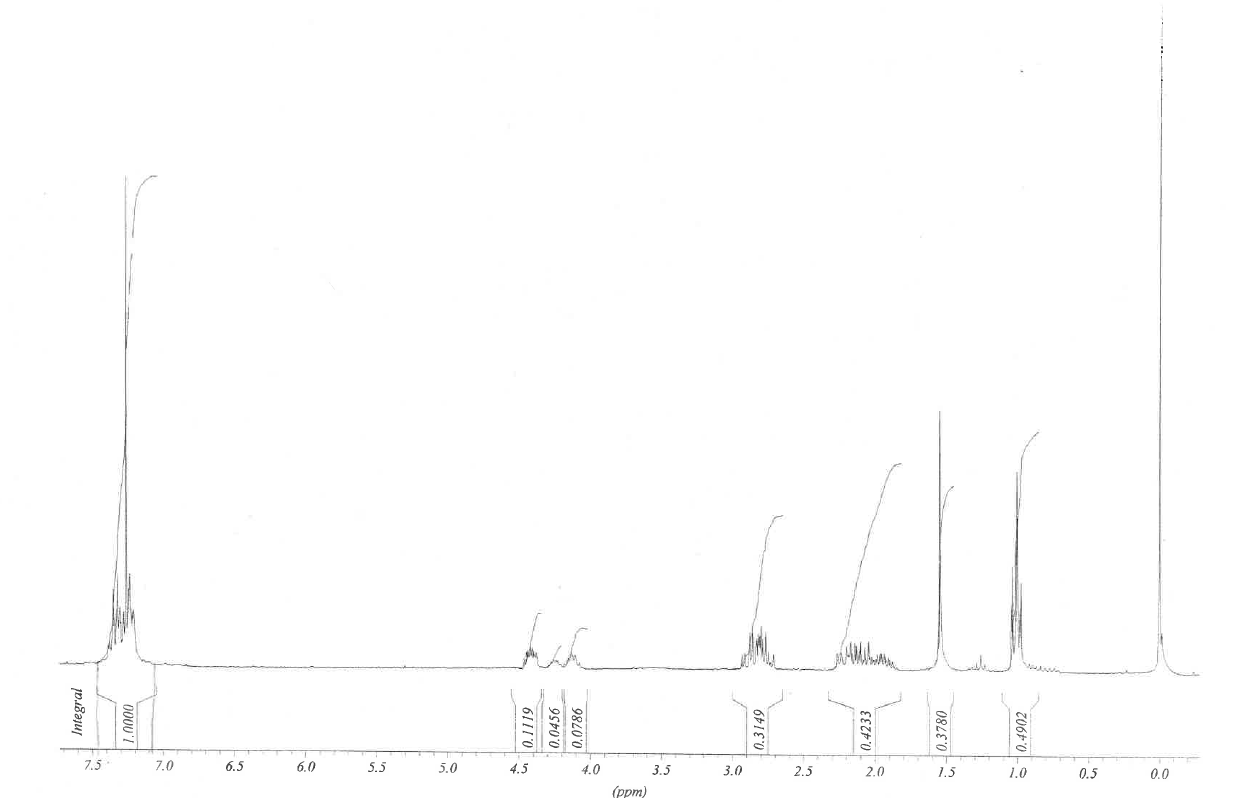


**3g. 3-nitro-4-octanol.** Translucent Liquid; IR (neat): νmax 3431, 2958, 2935, 2873, 2862, 1548, 1712 cm-1; 1H NMR (250 MHz, CDCl3) δ 0.89-1.03 (tt, J = 7.33, 6H), δ 1.23-1.58 (m, 4H), δ 1.79-2.30 (m, 3H), δ 3.84-4.08 (m, 1H), δ 4.33-4.45 (m, 1H).


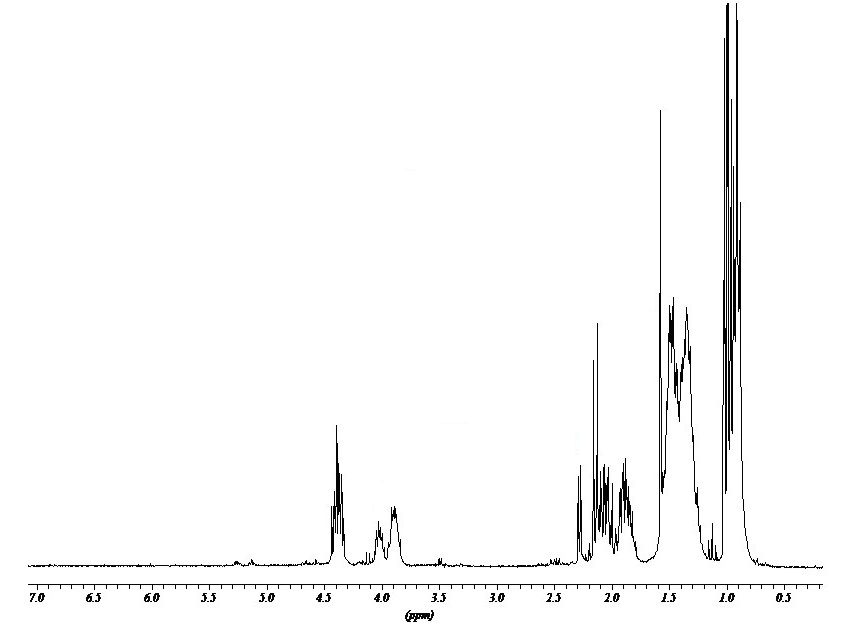


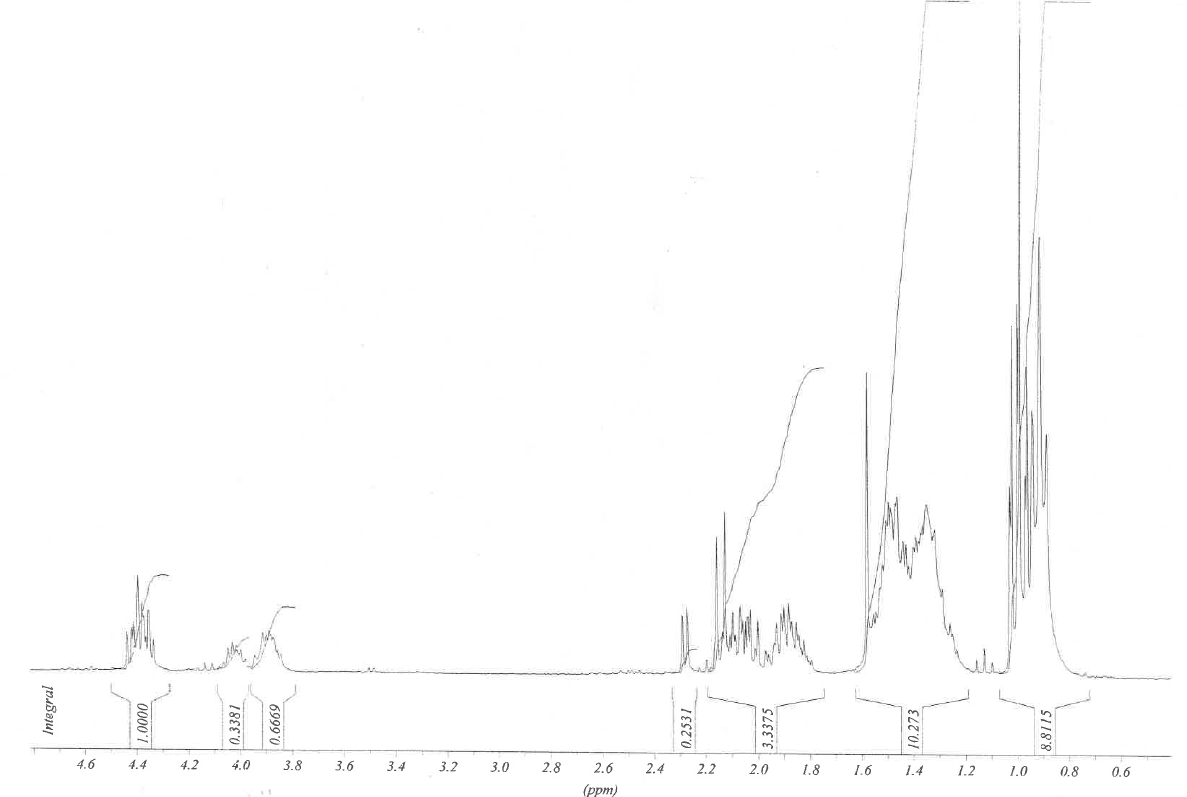


**3h. 4-nitro-1-phenyl-3-heptanol.** White solid, M.P.: 54-59 oC; IR (neat): νmax 3528, 3103, 3062, 2986, 2970, 1552 cm-1. 1H NMR (250 MHz, CDCl3) δ 7.36-7.16 (m, 5H), 4.54-4.41 (m, 1H), 4.10-3.78 (2m, 1H), 2.98-2.61 (m, 2H), 2.50-2.22 (2m, 1H), 2.15-1.64 (m, 4H), 1.43-1.24 (sext, 2H, *J* = 7.32 Hz), 0.94 (t, 3H, *J* = 7.32 Hz). 13C NMR (62.9 MHz, CDCl3) δ 140.9, 128.6, 128.5, 92.7, 71.3, 35.3, 32.5, 31.6, 19.0, 13.4.


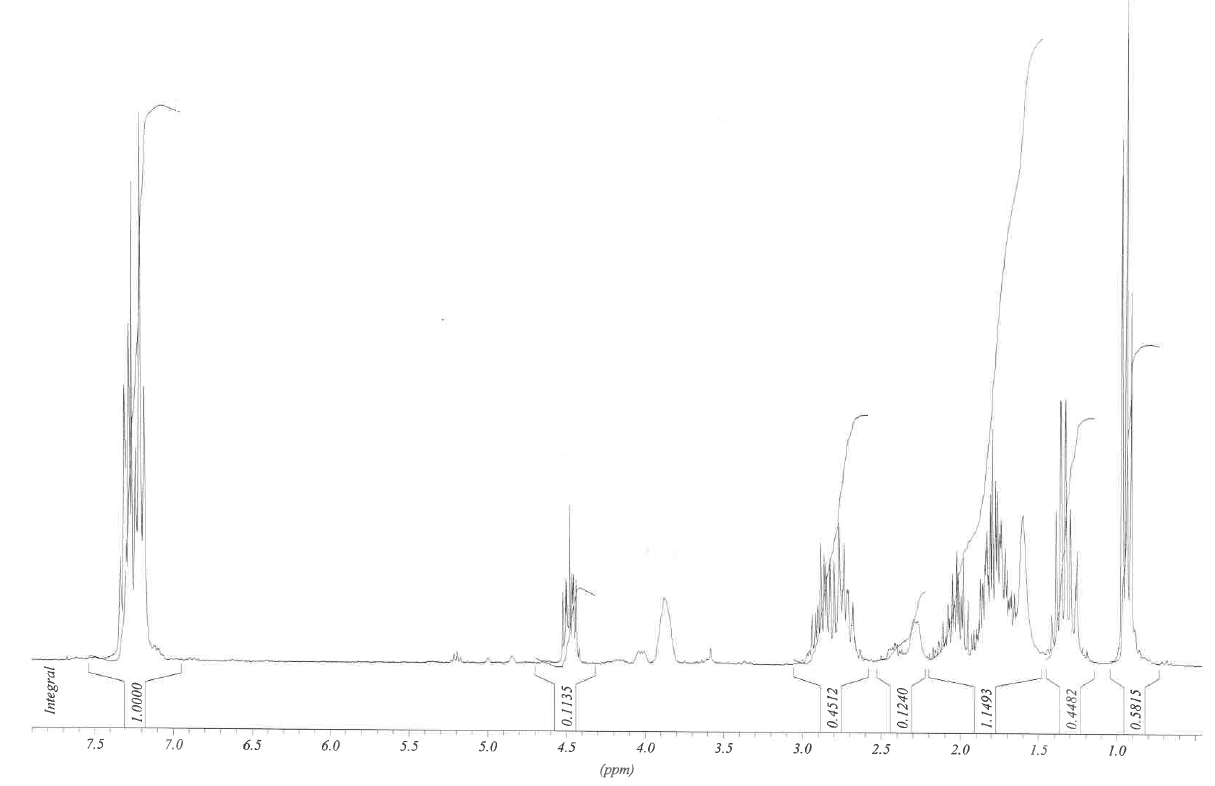


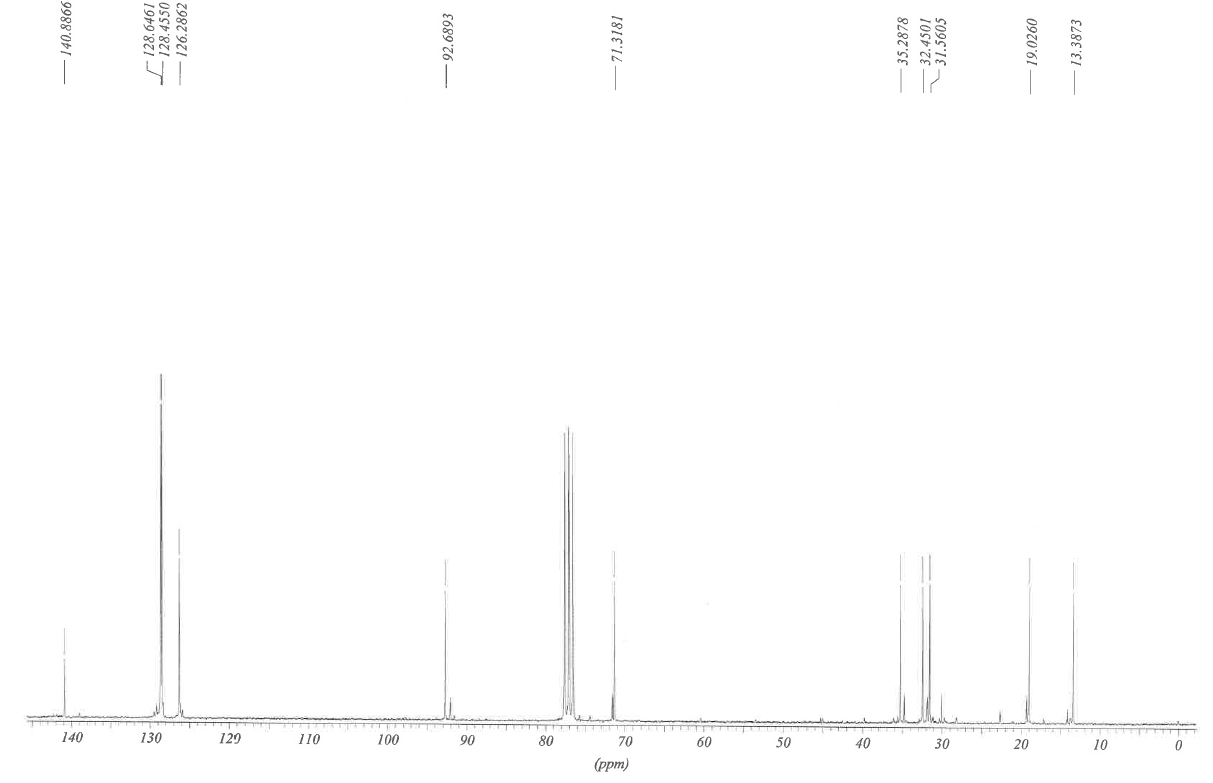


**3i. 4-nitro-5-decanol.** Pale Yellow Liquid, IR (neat): νmax 3527, 3421, 2958, 2933, 2873, 2852, 1550 cm-1; 1H NMR (250 MHz, CDCl3) δ 4.53-4.41 (m, 2H), 4.03 (s, 0.29H), 3.87 (s, 0.71H), 2.30 (s, 1H), 1.83-1.67 (m, 3H), 1.63-1.24 (m, 19H), 1.00-0.86 (2t, 12H, *J* = 7.32 Hz). 13C NMR (62.9 MHz, CDCl3) δ 92.7, 92.1, 72.5, 72.1, 33.6, 33.2, 32.5, 31.6, 31.5, 30.0, 25.3, 25.0, 22.5, 19.3, 19.1. 13.9, 13.5, 13.4.


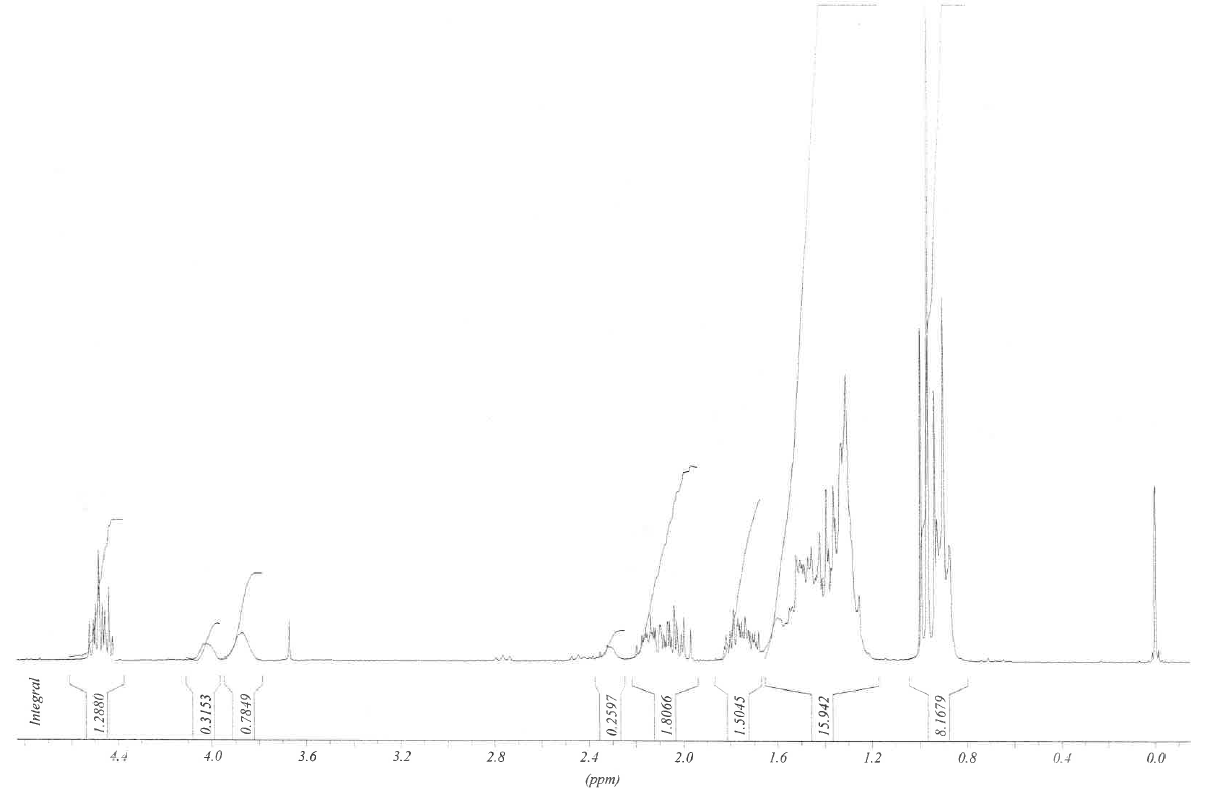


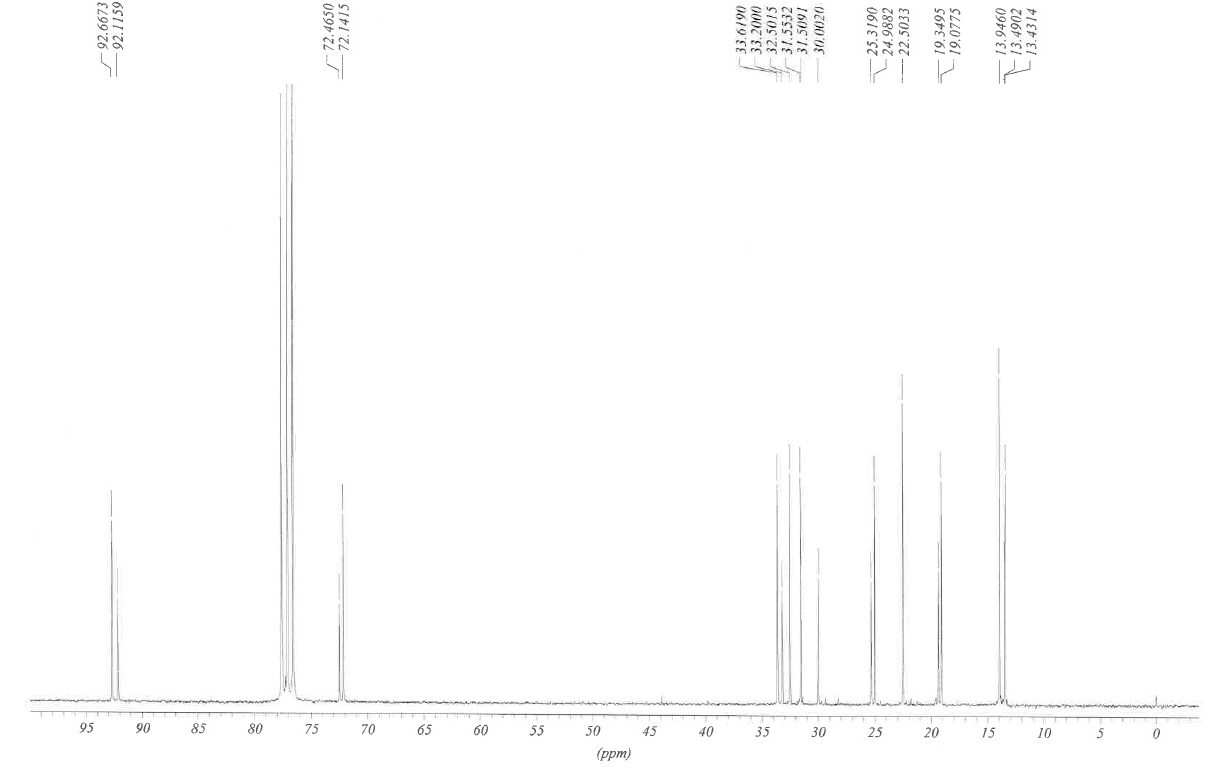


**3j. 2-nitro-1-(4-nitrophenyl)hexan-1-ol.** Yellow Liquid; IR (neat): νmax 3527, 3508, 3113, 3082, 2958, 2931, 1556, 1519 cm-1; 1H NMR (250 MHz, CDCl3) δ 8.31-8.23 (dd, 4H, *J* = 8.55 Hz and 2.45 Hz), 7.62-7.55 (dd, 4H, *J* = 8.54 Hz and 2.44 Hz), 5.33 (d, 1H, *J* = 9.76 Hz and 3.66 Hz), 5.17 (d, 1H, *J* = 7.94 Hz), 4.74-4.60 (m, 2H), 3.03 (s, 1H), 2.82 (s, 1H), 2.30-1.65 (m, 4H), 1.51-1.12 (m, 8H), 0.98-0.75 (2t, 6H, *J* = 6.1 Hz). 13C NMR (62.9 MHz, CDCl3) δ 148.4, 148.1, 145.7, 145.6, 127.9, 127.3, 124.2, 123.9, 93.2, 92.7, 74.5, 73.5, 30.0, 27.9, 27.6, 27.4, 22.0, 21.8, 13.6, 13.6.

**
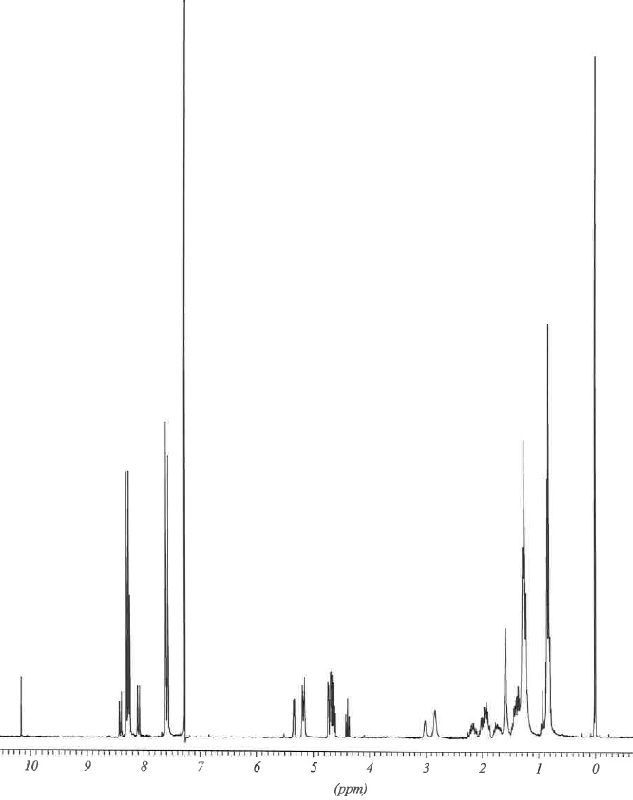
**

**
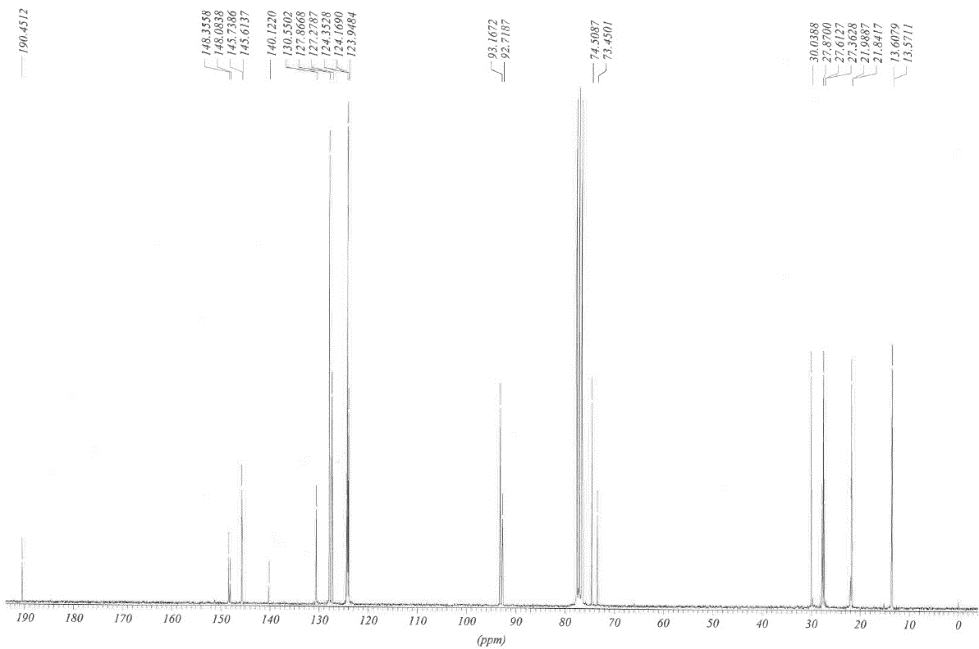
**

**3k. 2-nitro-1-phenylethanol.** Dark Red Liquid; IR (neat): νmax 3529, 3431, 3421, 3064, 3032, 2920, 1556 cm-1; 1H NMR (250 MHz, CDCl3) δ 7.45-7.33 (m, 1H), 5.48 (dd, 1H, *J* = 3.66 Hz and *J* = 9.16 Hz), 4.68-4.48 (m, 2H), 2.80 (s, 1H). 13C NMR (62.9 MHz, CDCl3) δ 138.2, 129.1, 126.0, 81.3, 71.0.

**
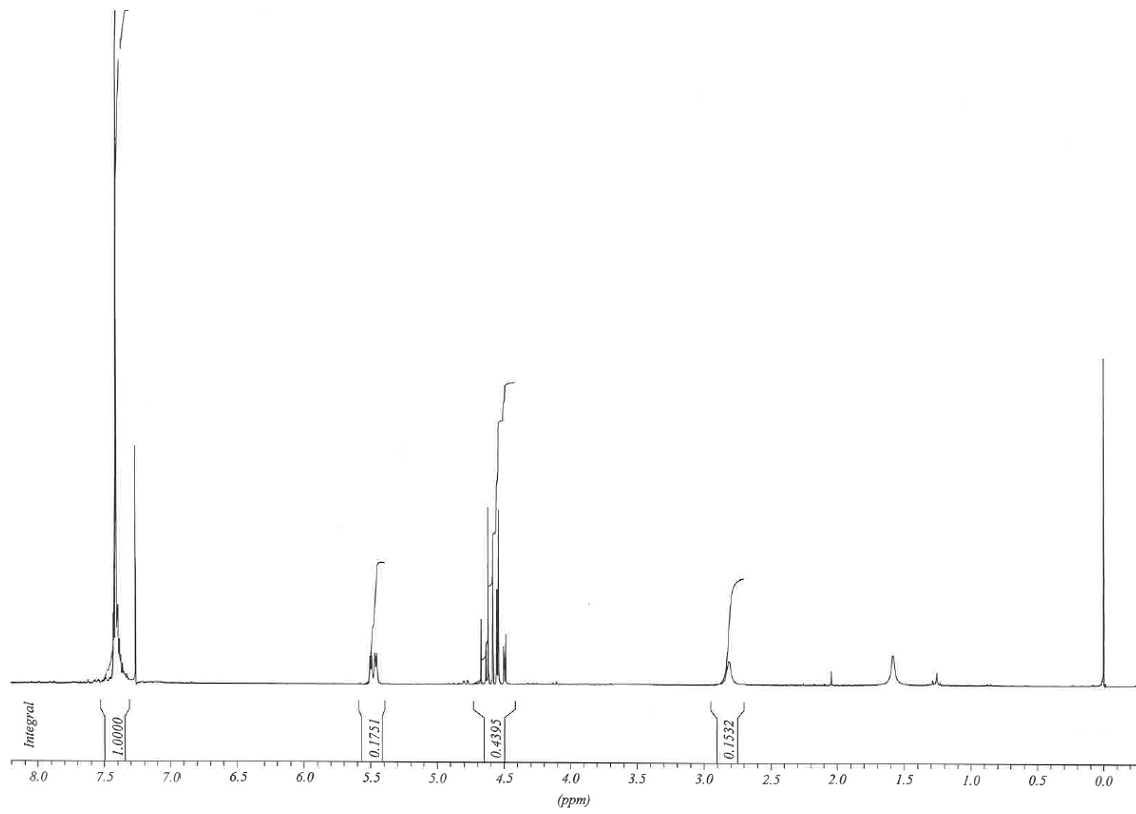
**

**
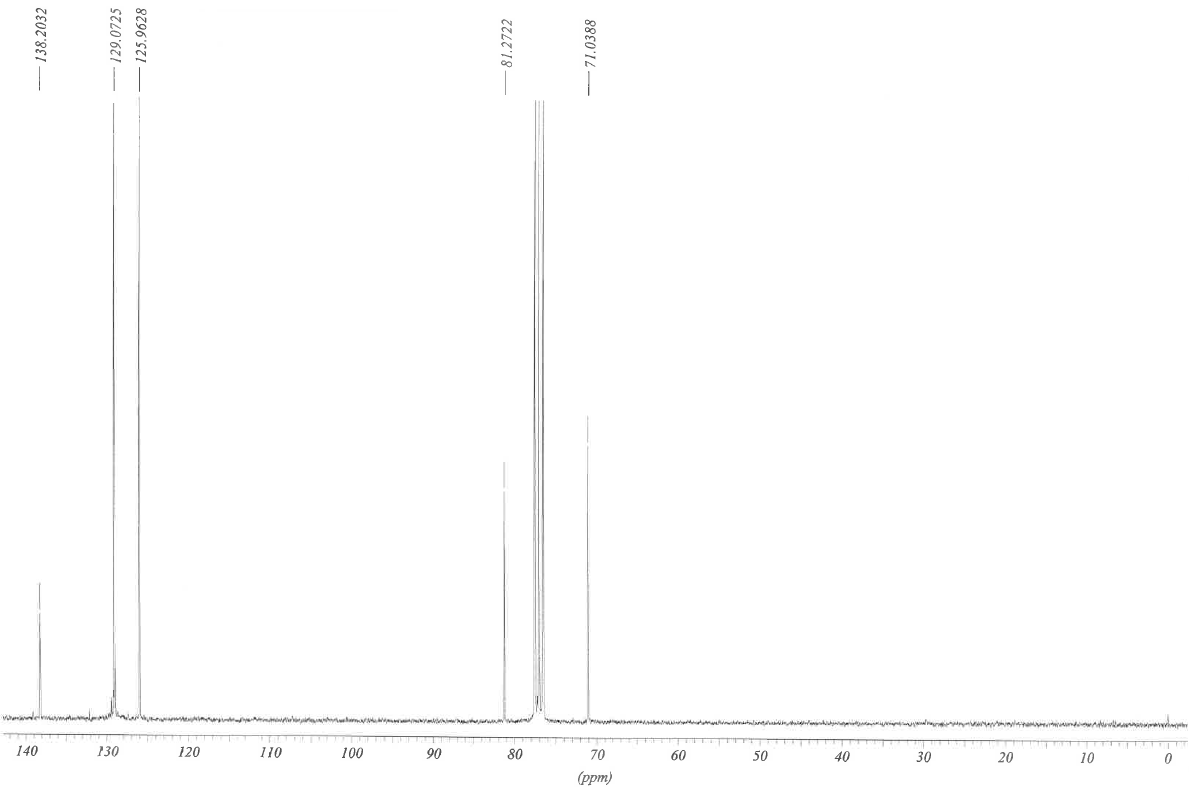
**

**3l. 2-nitro-1-cyclohexylethanol.** Yellow Liquid, IR (neat): νmax 3417, 2924, 2852, 1556, 1523 cm-1; 1H NMR (250 MHz, CDCl3) δ 4.57-4.37 (m, 2H), 4.17-4.06 (m, 1H), 2.43 (br, 1H), 1.88-1.40 (m, 7H), 1.36-1.00 (m, 4H). 13C NMR (62.9 MHz, CDCl3) δ 79.4, 72.9, 41.5, 28.9, 28.0, 26.1, 25.9, 25.8.


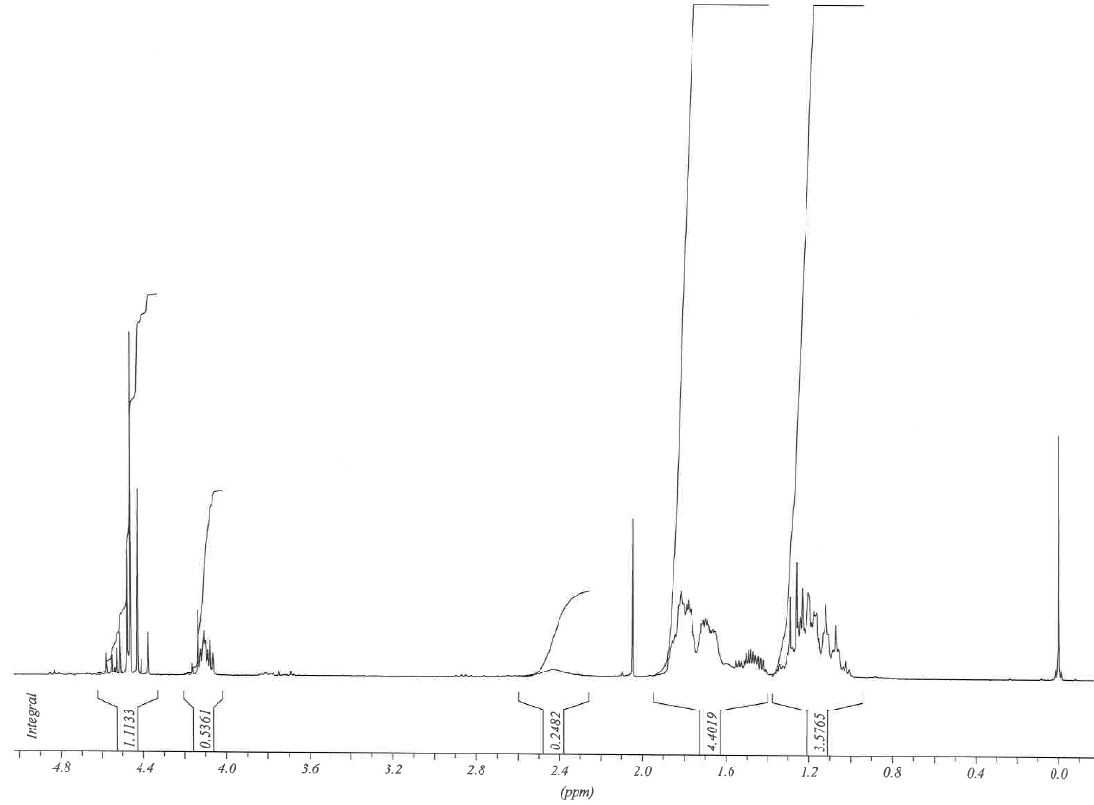


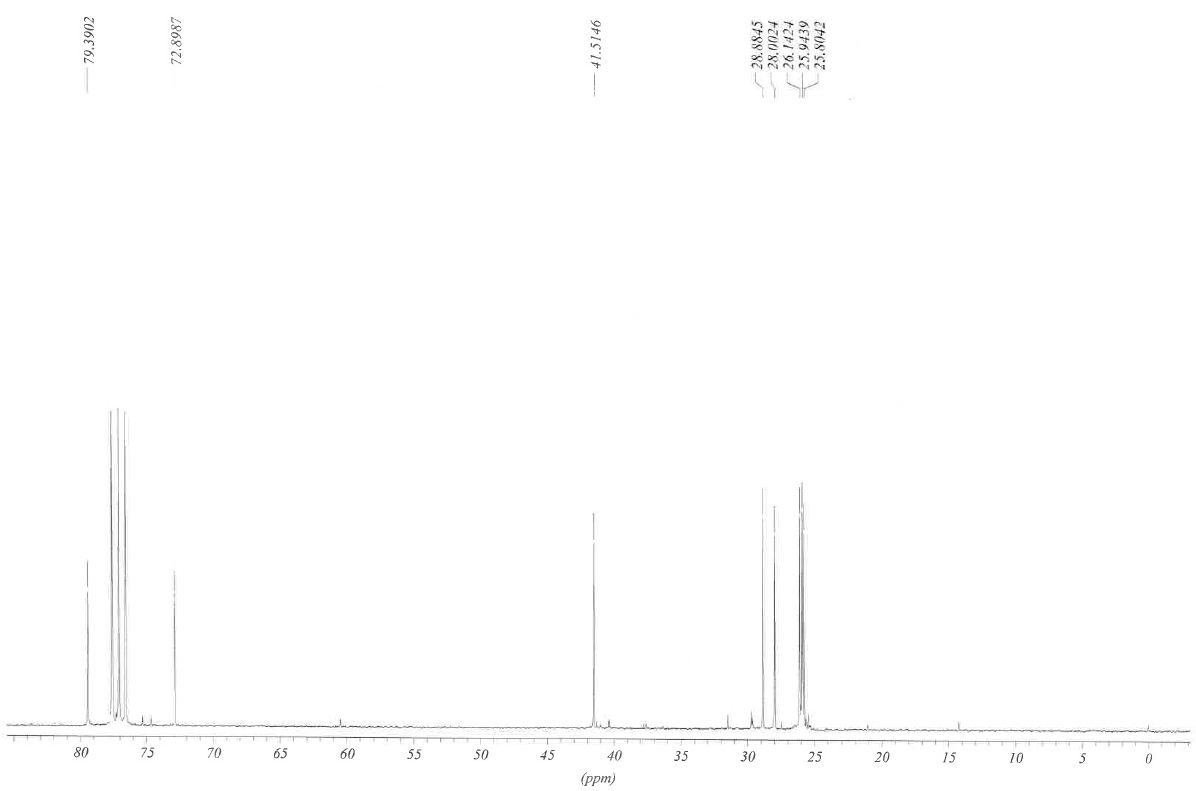


**3m. 1-(4-methoxyphenyl)-2-nitroethanol.** Dark Red Liquid; IR (neat): νmax 3462, 3007, 2962, 2937, 1176, 1556, 1548 cm-1; 1H NMR (250 MHz, CDCl3) δ 7.33 (d, 2H, *J* = 8.55 Hz), 6.93 (d, 2H, *J* = 8.54 Hz), 5.46-5.37 (dd, 1H, *J* = 2.44 Hz and *J* = 9.16 Hz), 4.66-4.44 (m, 2H), 3.82 (s, 3H), 2.72 (s, 1H). 13C NMR (62.9 MHz, CDCl3) δ 160.1, 130.3, 127.3, 115.0, 81.3, 70.7, 55.4.


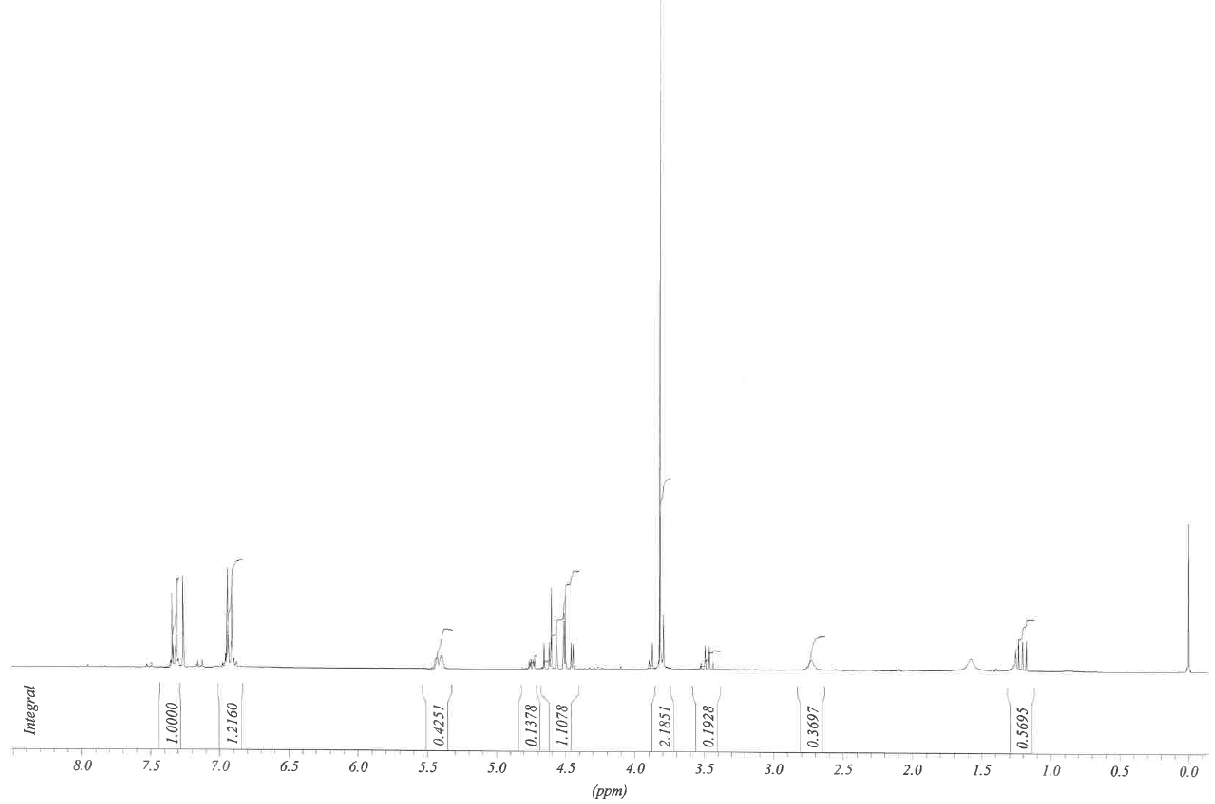


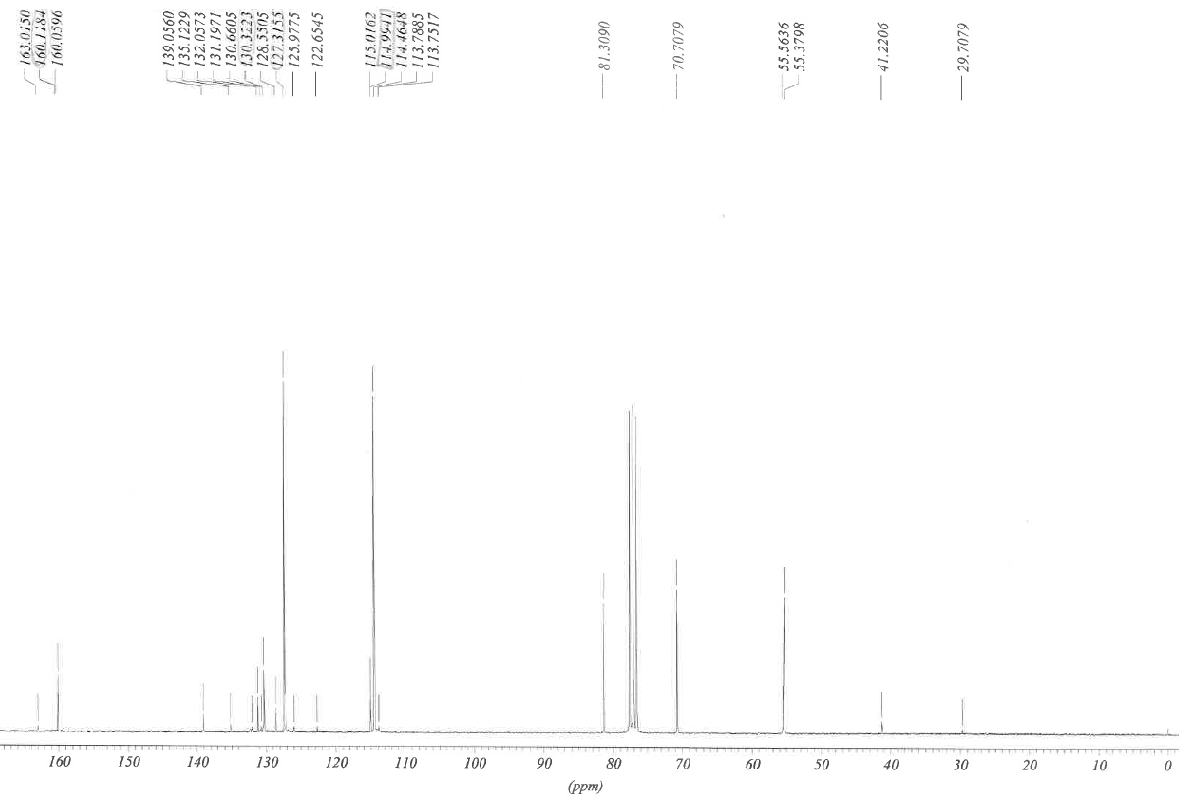


**3n. 2-nitro-1-(4-nitrophenol)ethanol.** Red Liquid, IR (neat): νmax 3520, 3477, 3113, 3082, 2972, 2924, 1556, 1519 cm-1; 1H NMR (250 MHz, CDCl3) δ 8.31-8.24 (d, 2H, *J* = 8.55 Hz), 7.67-7.60 (d, 2H, *J* = 8.53 Hz), 5.66-5.57 (quin, 1H, *J* = 3.66 Hz), 4.67-4.53 (m, 2H), 3.38-3.33 (d, 1H, *J* = 3.66 Hz). 13C NMR (62.9 MHz, CDCl3) δ 148.2, 145.2, 127.0, 124.2, 80.7, 70.0.

**
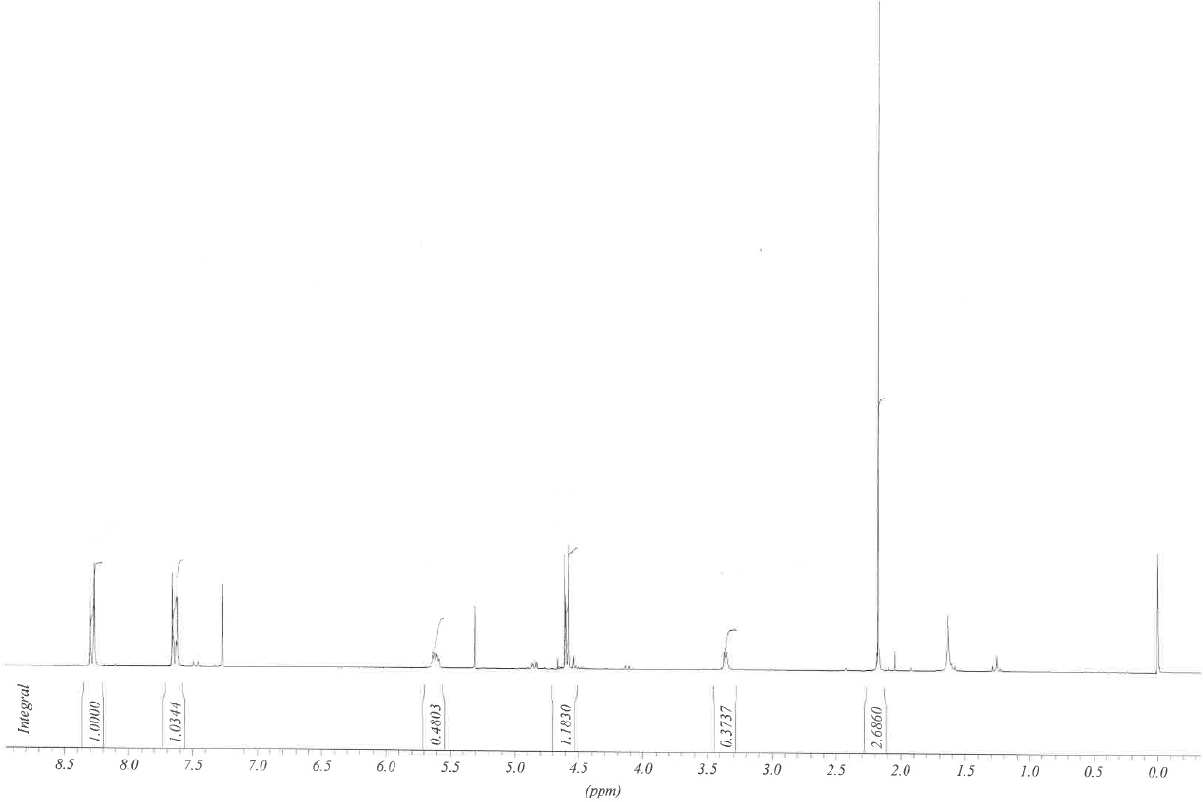
**

**
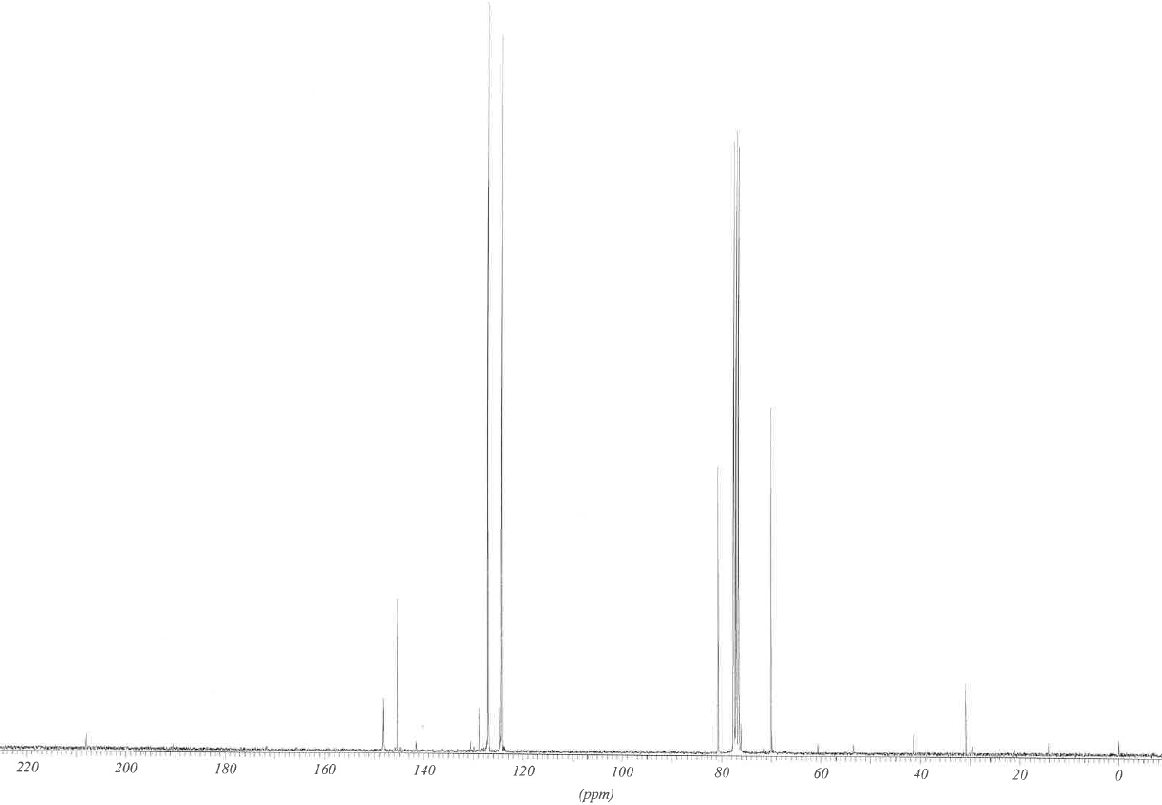
**

**3o. 1-bromo-1-nitro-2-propanol.** Pale Yellow Liquid, IR (neat): νmax 3408, 3387, 2983, 2937, 1560 cm-1.; 1H NMR (250 MHz, CDCl3) δ 5.95 (d, 0.32H, *J* = 3.66 Hz), 5.74 (d, 0.68H, *J* = 7.94 Hz), 4.53-4.36 (m, 1H), 2.20 (s, 1H), 1.46 (d, 2.04H, *J* = 6.1 Hz), 1.37 (d, 0.96H, *J* = 6.1 Hz). 13C NMR (62.9 MHz, CDCl3) δ 86.4, 82.5, 69.9, 69.1, 19.4, 18.8.

## 4.4.2 Analytical data and spectra for Michael mono-adducts

**8a. Methyl 4-nitrobutanoate.** Pale Green Liquid, IR (neat): νmax 2906, 1732, 1556 cm-1; 1H NMR (250 MHz, CDCl3) δ 4.56-4.45 (t, 2H, *J* = 6.72 Hz), 3.72 (s, 3H), 2.53-2.45 (t, 2H, *J* = 6.72 Hz), 2.4-2.25 (quin, 2H, *J* = 6.71 Hz). 13C NMR (62.9 MHz, CDCl3) δ 172.4, 74.4, 51.9, 30.3, 22.4.


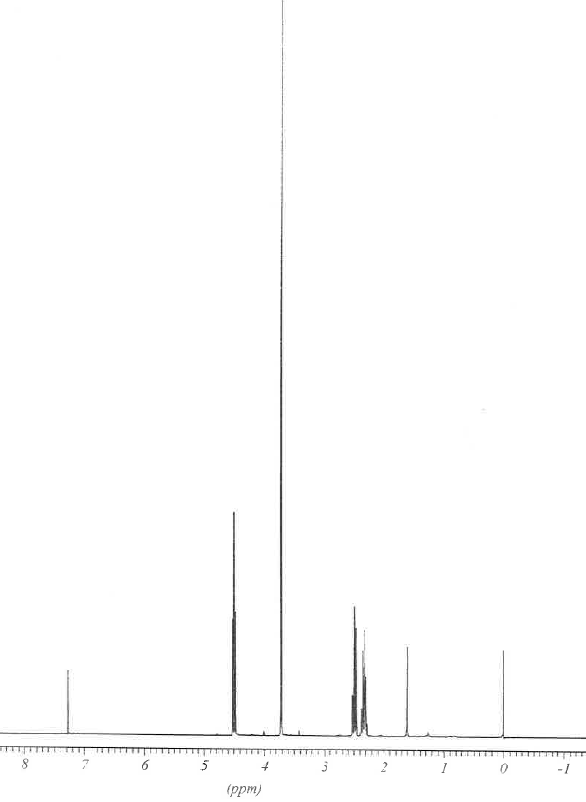


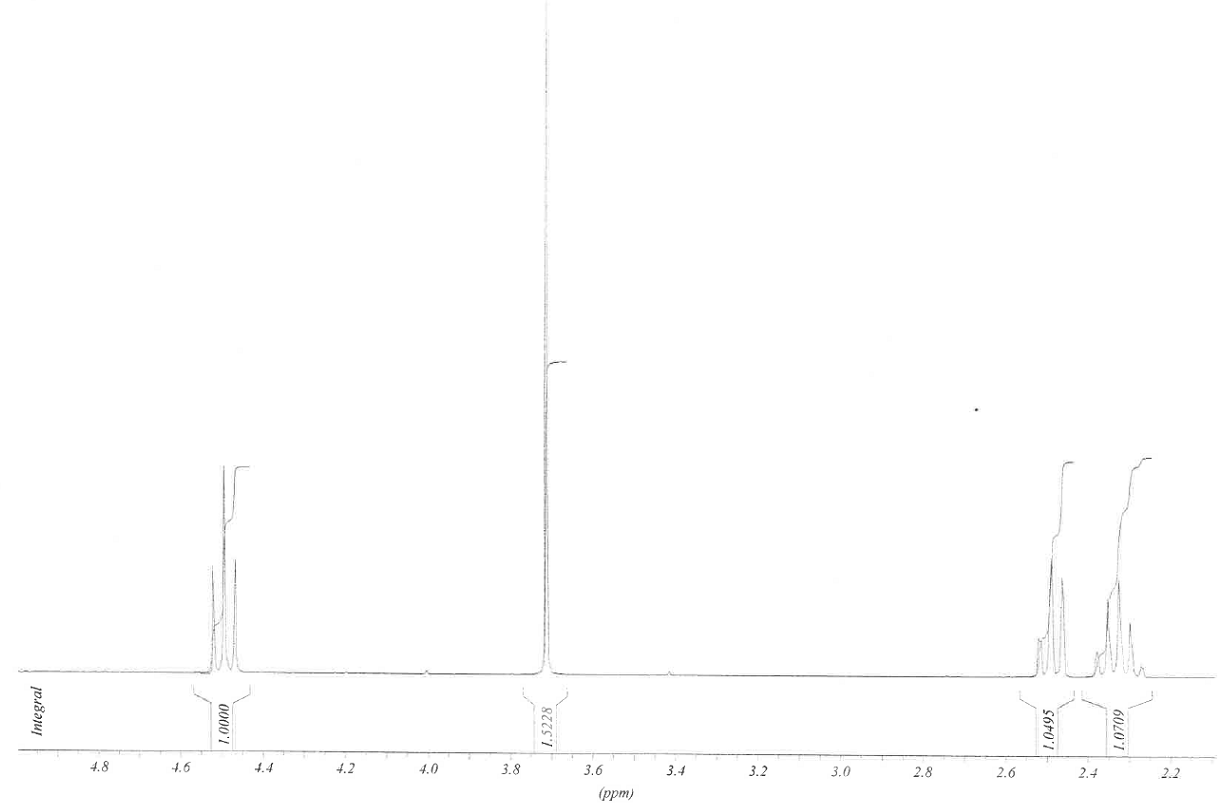


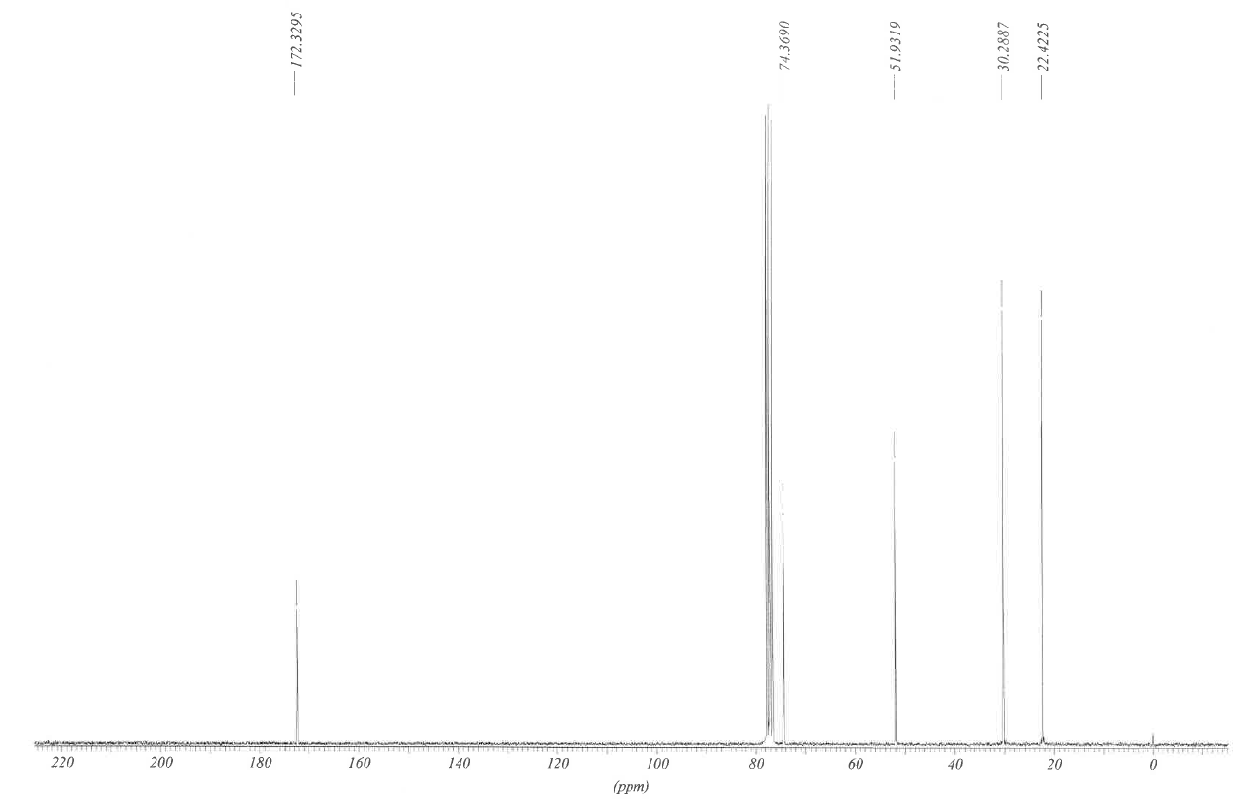


**8b. Methyl 4-nitrohexanoate.** Colourless Liquid, IR (neat): νmax 2962, 2937, 2877, 2850, 1735, 1544 cm-1; 1H NMR (250 MHz, CDCl3) δ 4.55-4.43 (m, 1H), 3.7 (s, 3H), 2.5-1.73 (m, 6H), 1.02-0.94 (t, 3H, *J* = 7.32 Hz). 13C NMR (62.9 MHz, CDCl3) δ 172.4, 89.2, 51.9, 30.0, 28.3, 27.2, 10.1.


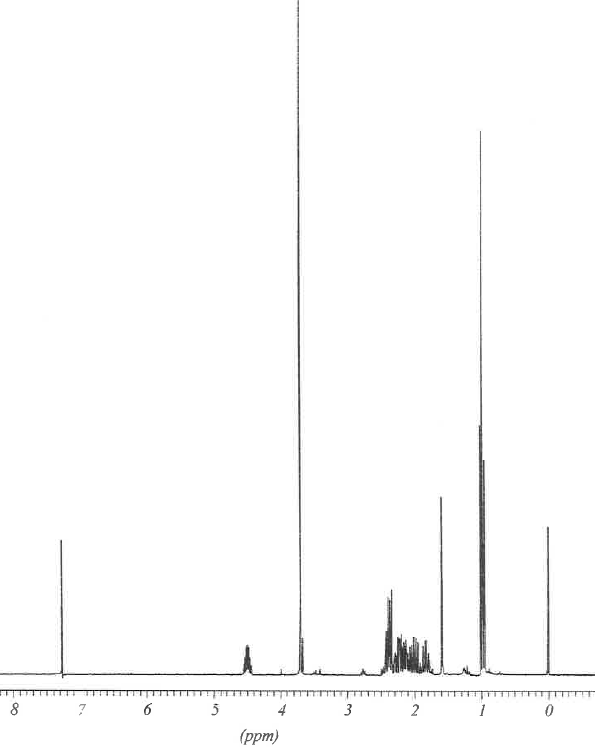


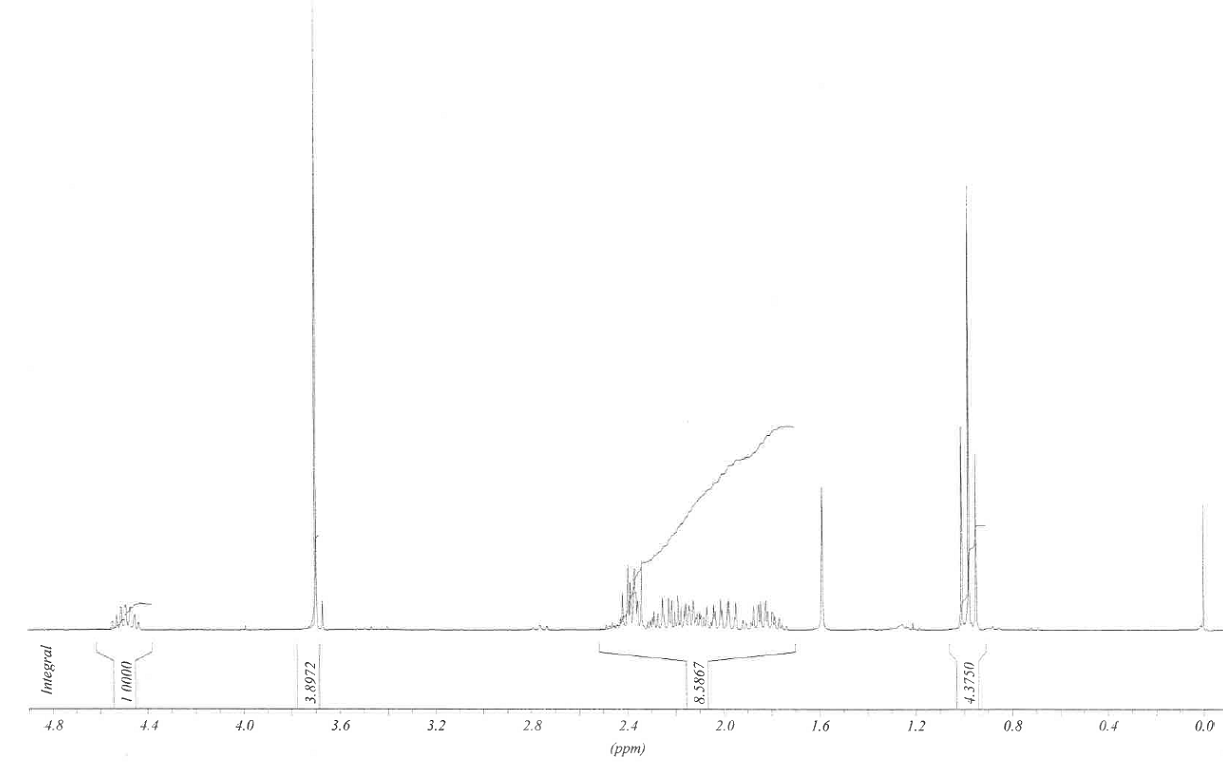


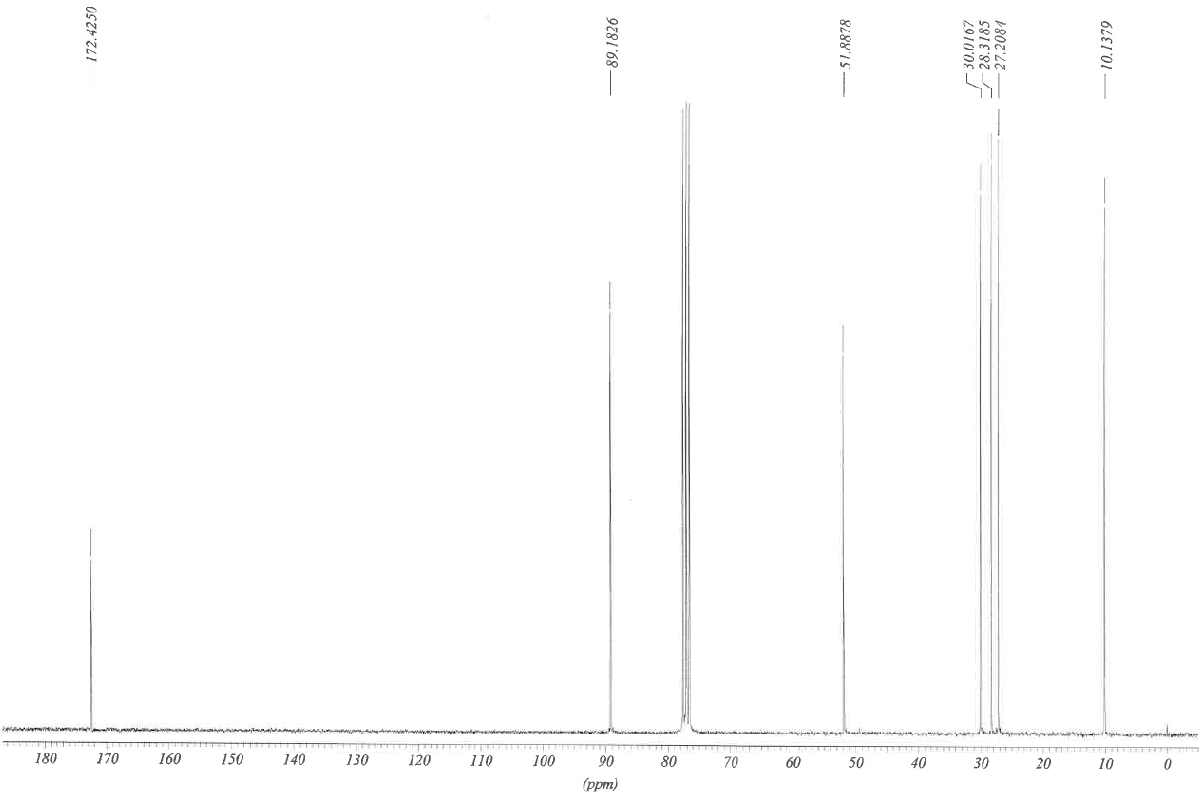


**8c. Methyl 4-methyl-4-nitropentanoate.** Colourless Liquid, IR (neat): νmax 2993, 2954, 2975, 2850, 1737, 1728, 1546 cm-1; 1H NMR (250 MHz, CDCl3) δ 3.70 (s, 3H), 2.39-2.22 (m, 4H), 1.6 (s, 6H). 13C NMR (62.9 MHz, CDCl3) δ 172.6, 87.3, 51.9, 35.4, 29.1, 25.8.


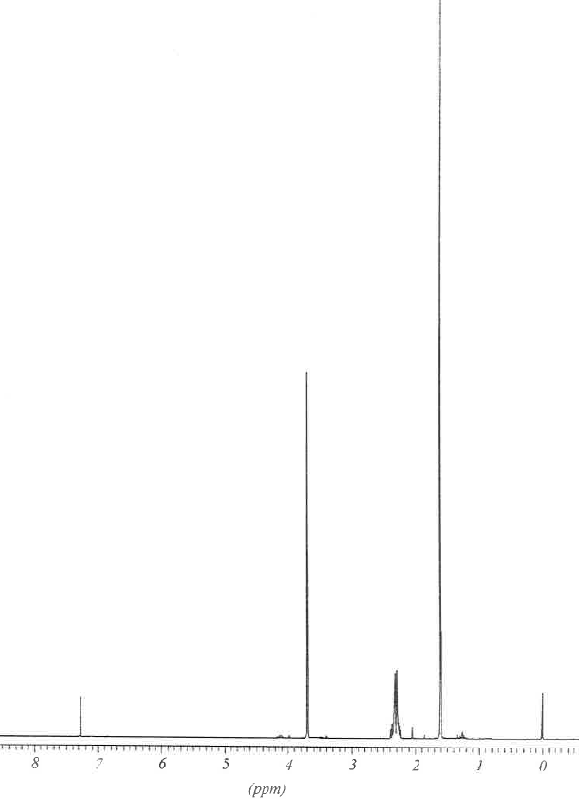


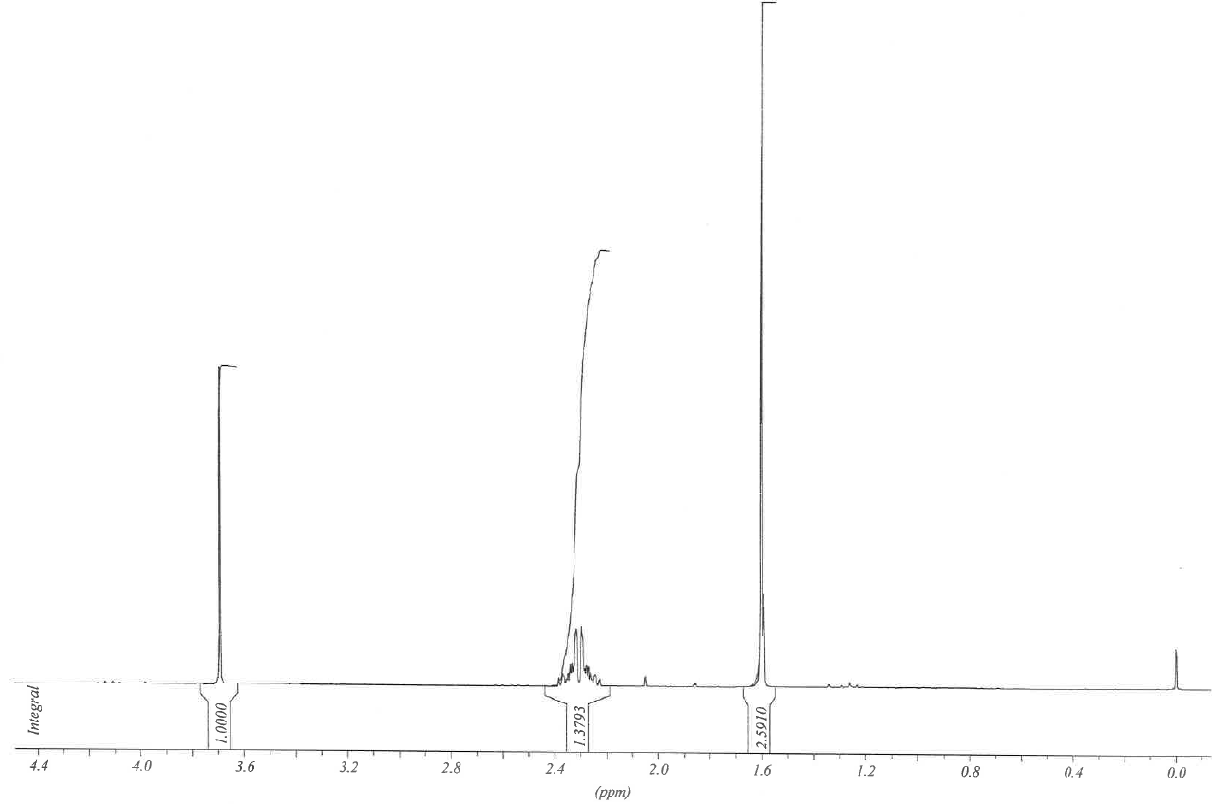


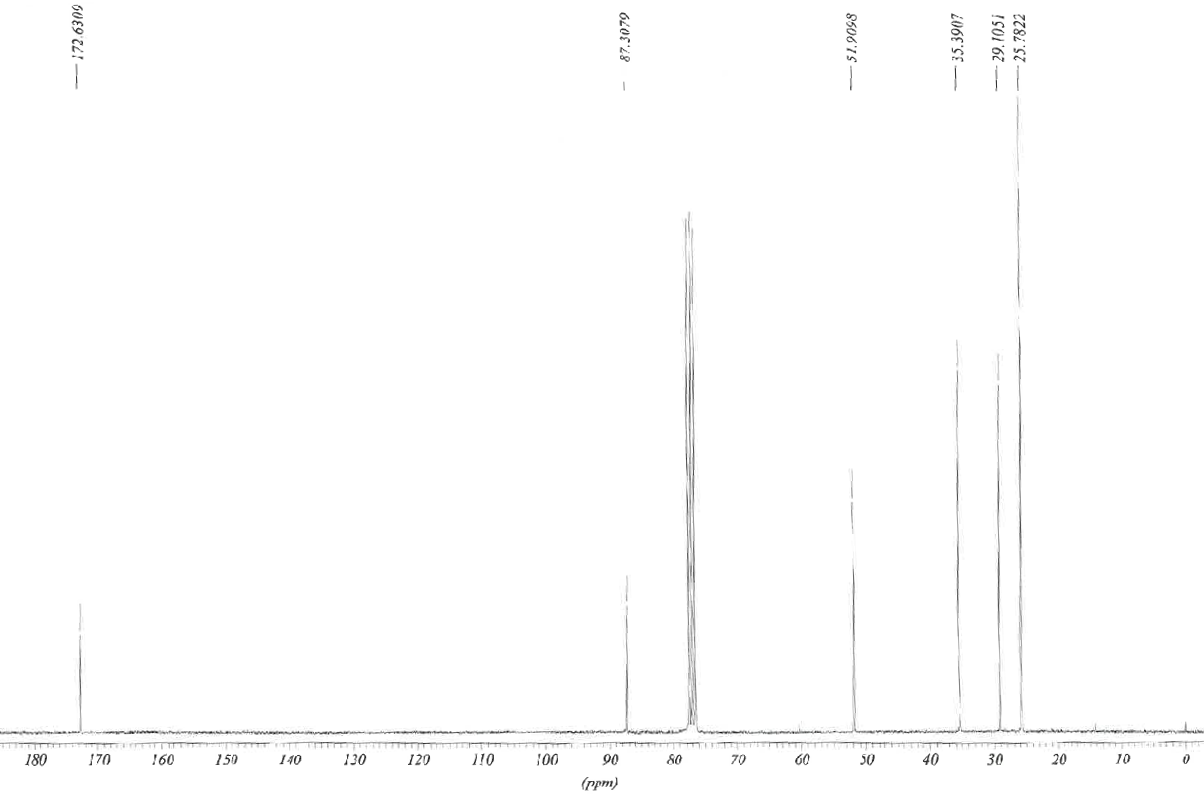


**8d. Methyl 4-nitroheptanoate.** Pale Yellow Liquid, IR (neat): νmax 2962, 2937, 2877, 1735, 1550, 1541 cm-1; 1H NMR (250 MHz, CDCl3) δ 4.51-4.64 (m, 1H), 3.70 (s, 3H), 1.90-2.49 (m, 5H), 1.63-178 (m, 1H), 1.45-1.28 (m, 2H), 0.99-0.91 (t, 3H, *J* = 7.33 Hz). 13C NMR (62.9 MHz, CDCl3) δ 172.4, 87.6, 51.9, 35.9, 30.0, 28.6, 19.0, 13.4.


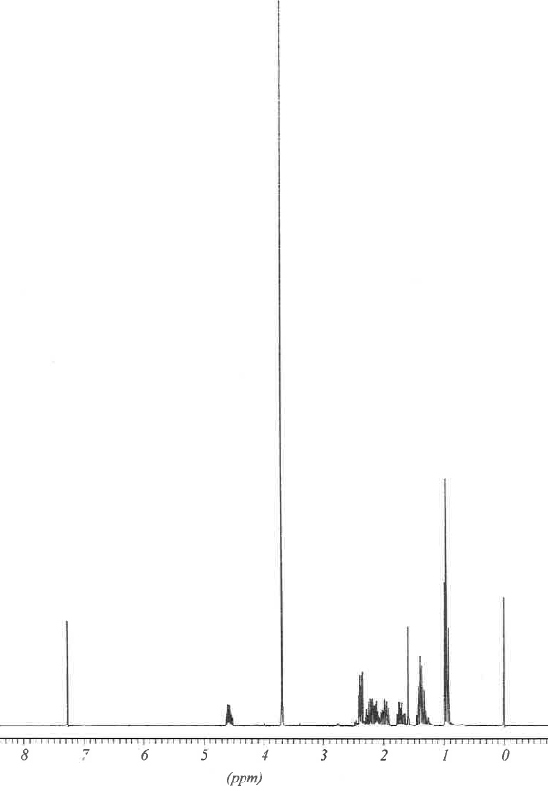


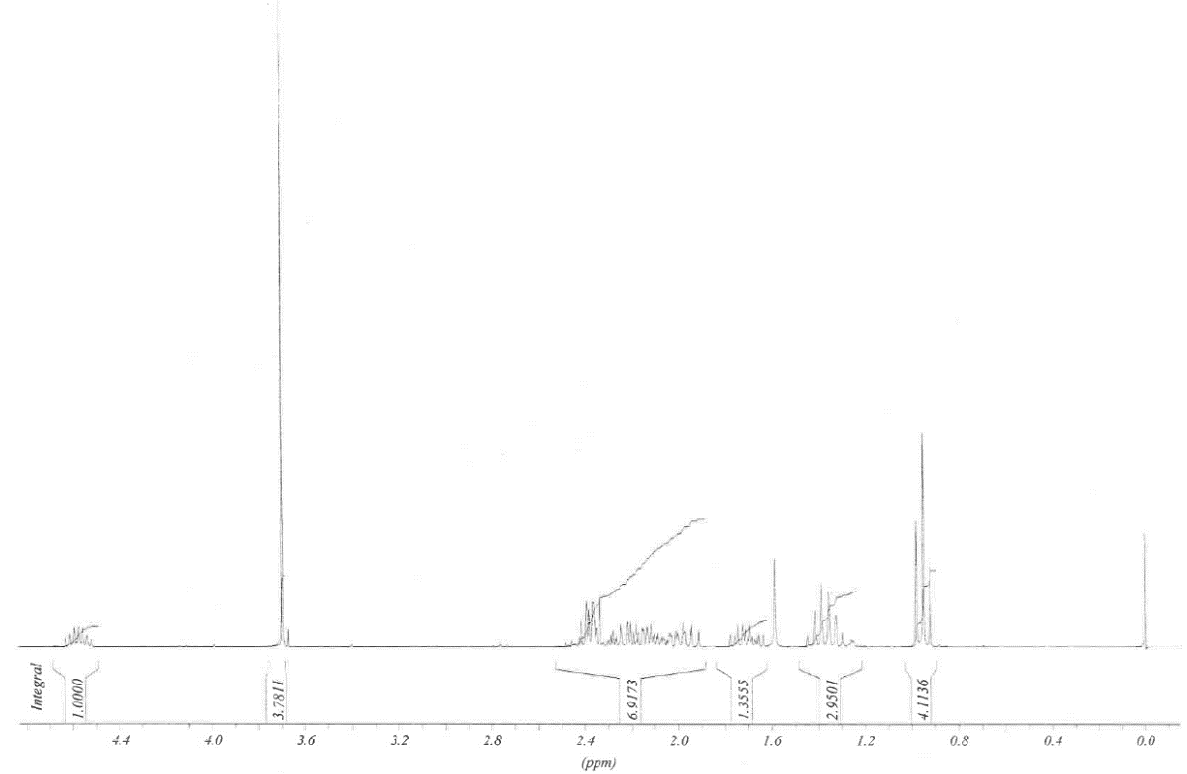


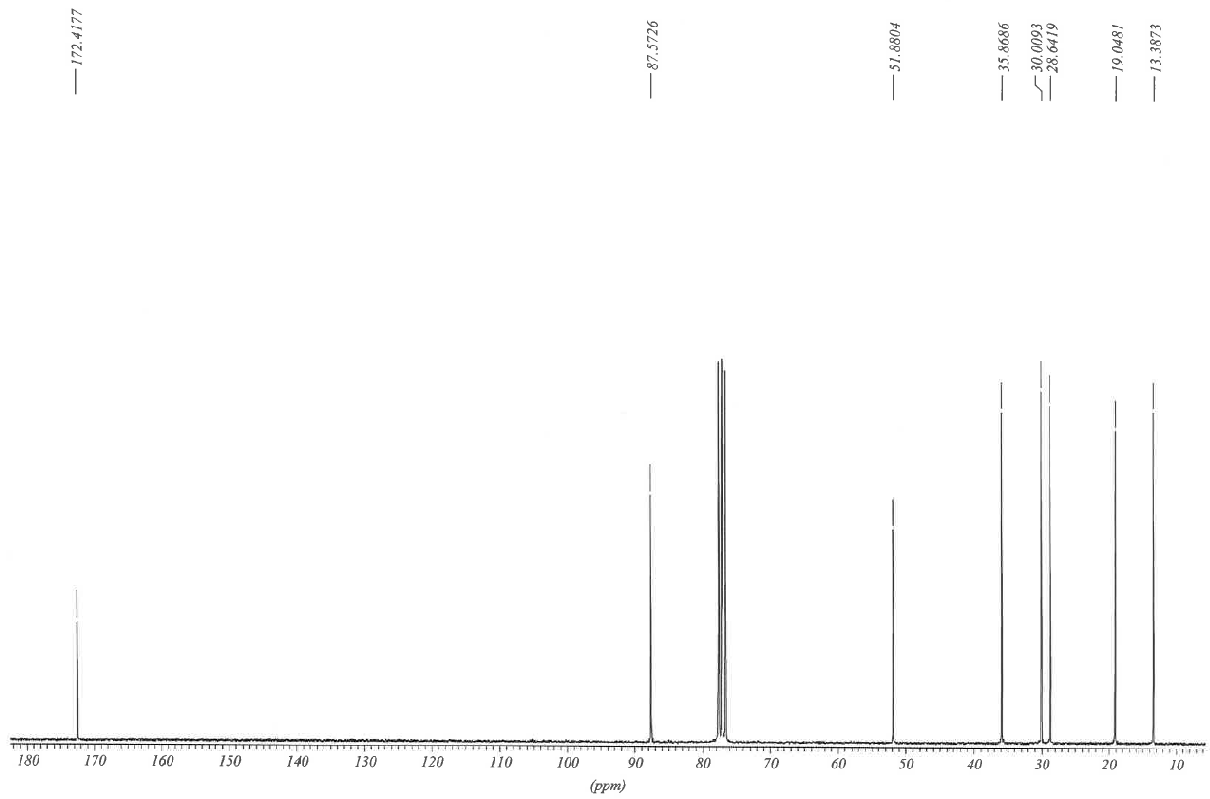


**8e. Methyl 4-nitrononanoate.** Colourless Liquid, IR (neat): νmax 2962, 2931, 1737, 1552, 1548 cm-1; 1H NMR (250 MHz, CDCl3) δ 4.61-4.48 (sept, 1H, *J* = 4.88 Hz), 3.70 (s, 3H), 2.48-1.90 (m, 5H), 1.80-1.65 (m, 1H), 1.38-1.24 (m, 6H), 0.97-0.82 (m, 3H). 13C NMR (62.9 MHz, CDCl3) δ 172.4, 87.9, 51.9, 33.9, 31.1, 30.0, 28.7, 25.4, 22.3, 13.9.


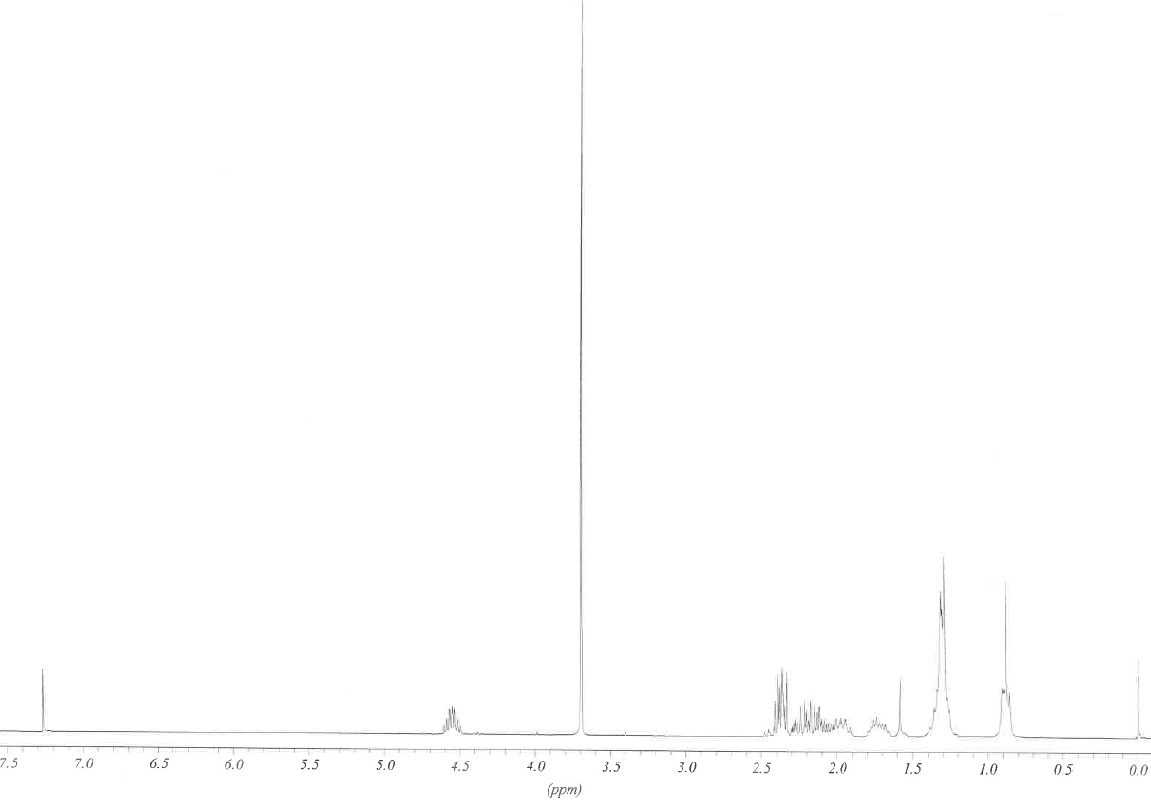


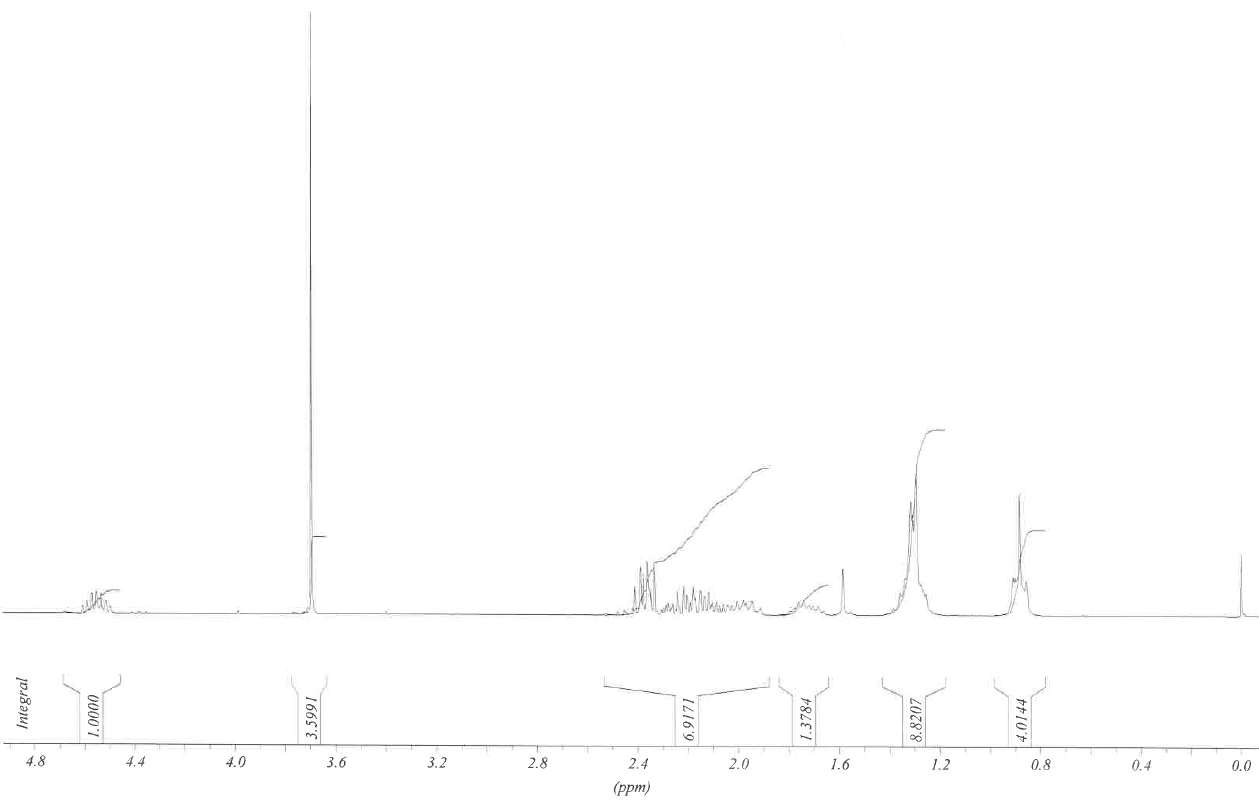


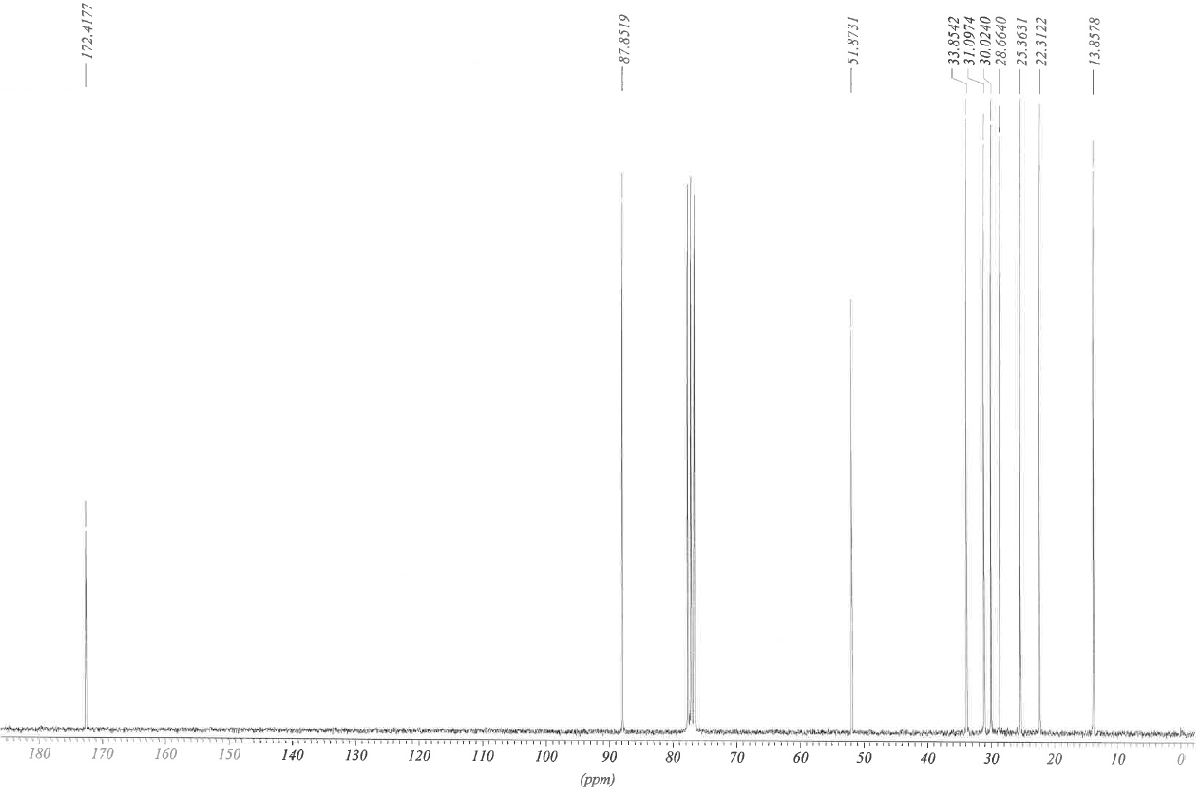


**8f. 3-(1-nitroethyl)cyclohexanone.** Pale Yellow Liquid, IR (neat): νmax 2947, 2872, 1712, 1544 cm-1; 1H NMR (250 MHz, CDCl3) δ 4.57-4.34 (m, 1H), 2.53-2.06 (m, 5H), 2.02-1.83 (m, 1H), 1.82-1.37 (m, 6H). 13C NMR (62.9 MHz, CDCl3) δ 208.6, 208.4, 87.0, 86.9, 43.7, 43.3, 42.5, 42.3, 40.9, 40.8, 27.5, 27.0, 24.4, 24.2, 16.3, 16.2.

**8g. 3-(2-nitropropan-2-yl)cyclohexanone.** Pale Yellow Solid, M. P.: 49–55 oC. IR (Nujol): νmax 1724, 1544 cm-1; 1H NMR (250 MHz, CDCl3) δ 2.50-2.39 (m, 2H), 2.38-2.23 (m, 2H), 2.20-2.06 (m, 2H), 1.87-1.75 (m, 1H), 1.72-1.60 (m, 1H), 1.59 (s, 3H), 1.57 (s, 3H), 1.51-1.33 (m, 1H). 13C NMR (62.9 MHz, CDCl3) δ 208.9, 90.7, 46.7, 42.7, 40.8, 26.1, 24.5, 23.6, 22.6.


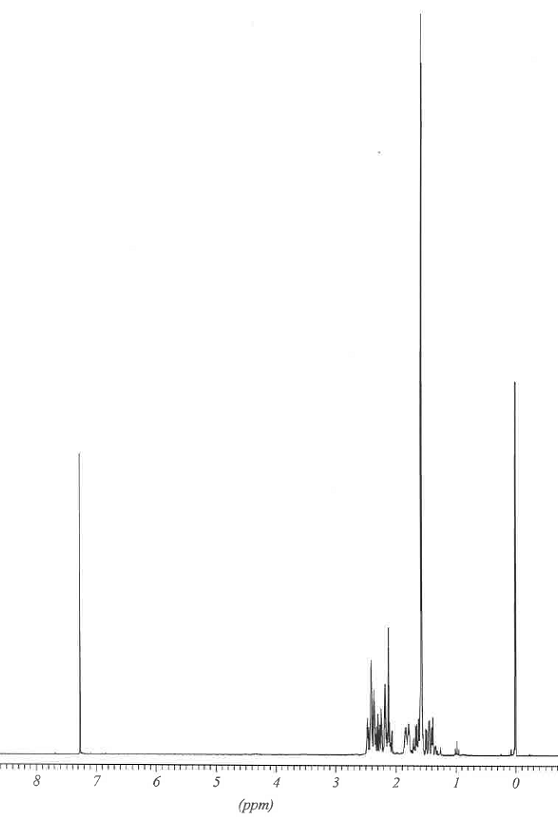


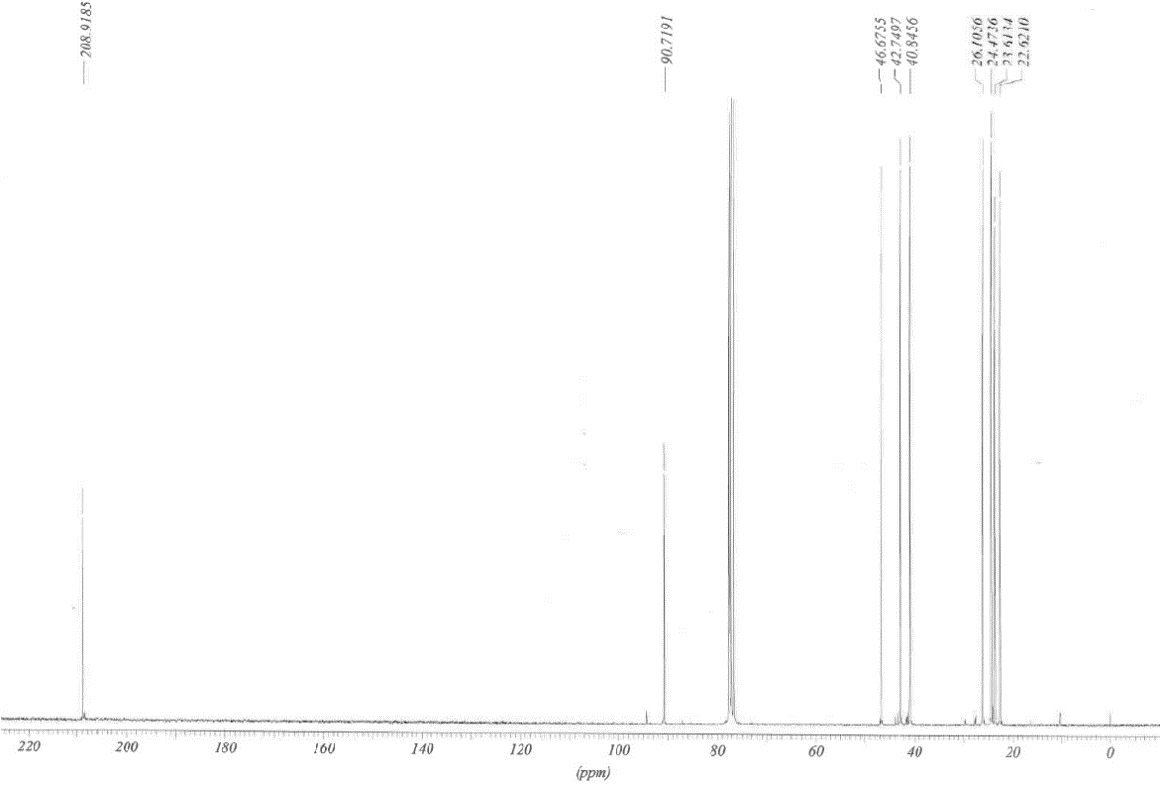


**8h. 3-(1-nitropropyl)cyclohexanone.** Yellow Liquid, IR (neat): νmax 2943, 2887, 1714, 1556, 1541 cm-1; 1H NMR (250 MHz, CDCl3) δ 4.41-4.25 (m, 1H), 2.55-2.38 (m, 2H), 2.37-2.07 (m, 4H), 2.06-1.73 (m, 3H), 1.72-1.35 (m, 2H), 1.01-0.93 (dt, 3H, *J* = 7.32 Hz and *J* = 2.44 Hz). 13C NMR (62.9 MHz, CDCl3) δ 208.6, 208.6, 94.3, 43.9, 43.4, 41.6, 41.4, 41.0, 40.9, 27.7, 27.5, 24.5, 24.2, 24.1, 10.4, 10.3.


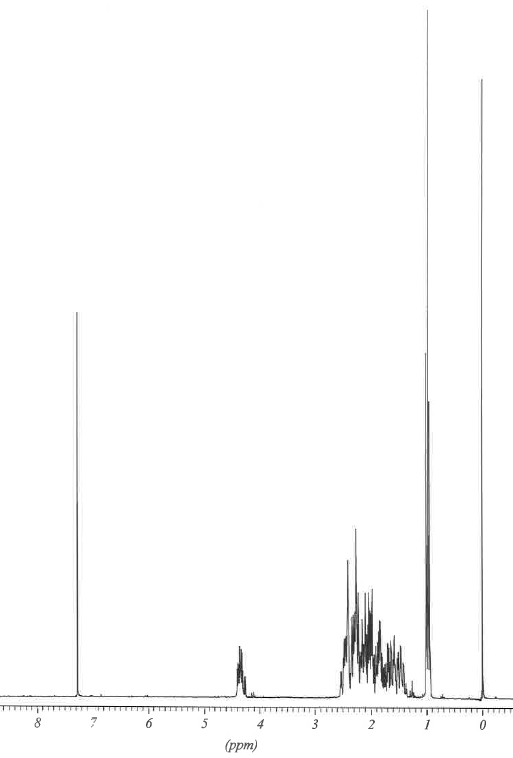


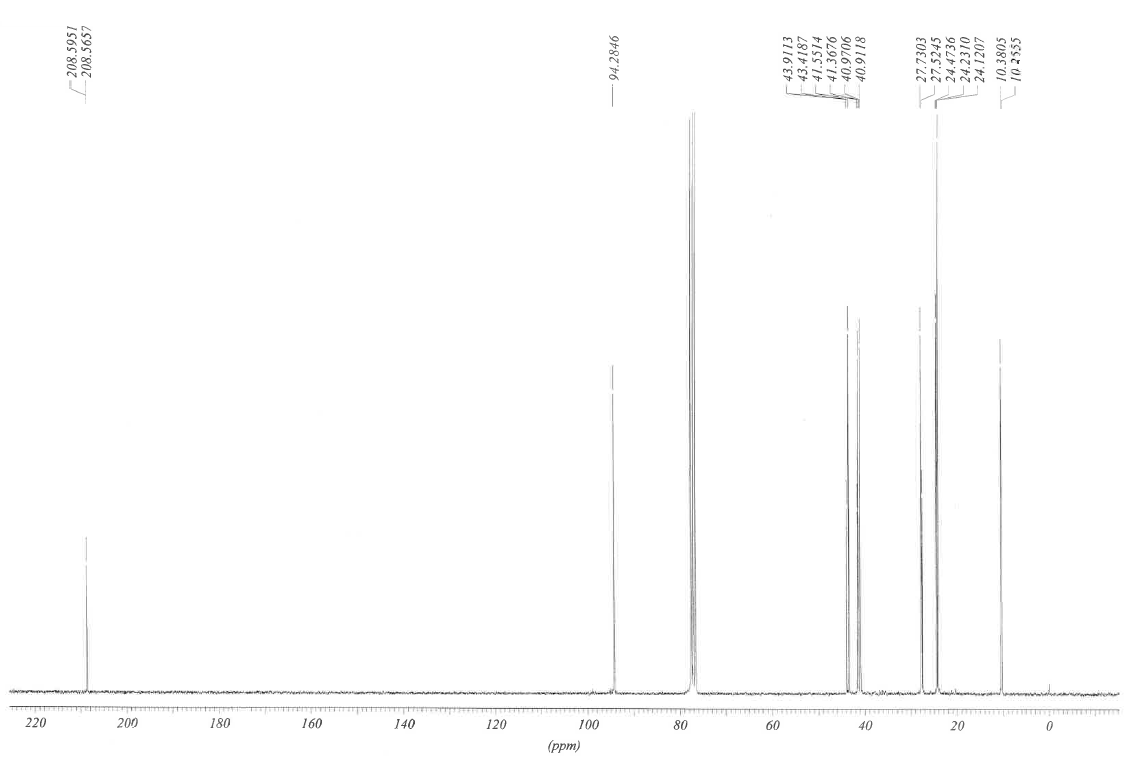


**8i. 3-(1-nitroethyl)cyclopentanone.** Colourless Liquid, IR (neat): νmax 2980, 2943, 2904, 1734, 1544 cm-1;

Diastereomer 1 **-** 1H NMR (250 MHz, CDCl3) δ 4.58-4.46 (m, 1H), 2.83-2.63 (m, 1H), 2.52-2.08 (m, 4H), 2.01-1.87 (m, 1H), 1.78-1.63 (m, 1H), 1.62-1.56 (d, 3H, *J* = 6.72 Hz). 13C NMR (62.9 MHz, CDCl3) δ 215.3, 87.0, 41.3, 41.0, 38.1, 26.6, 18.0.


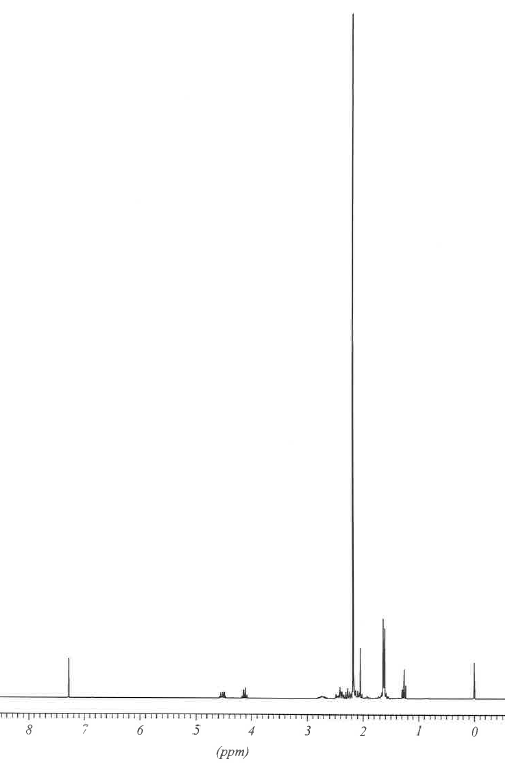


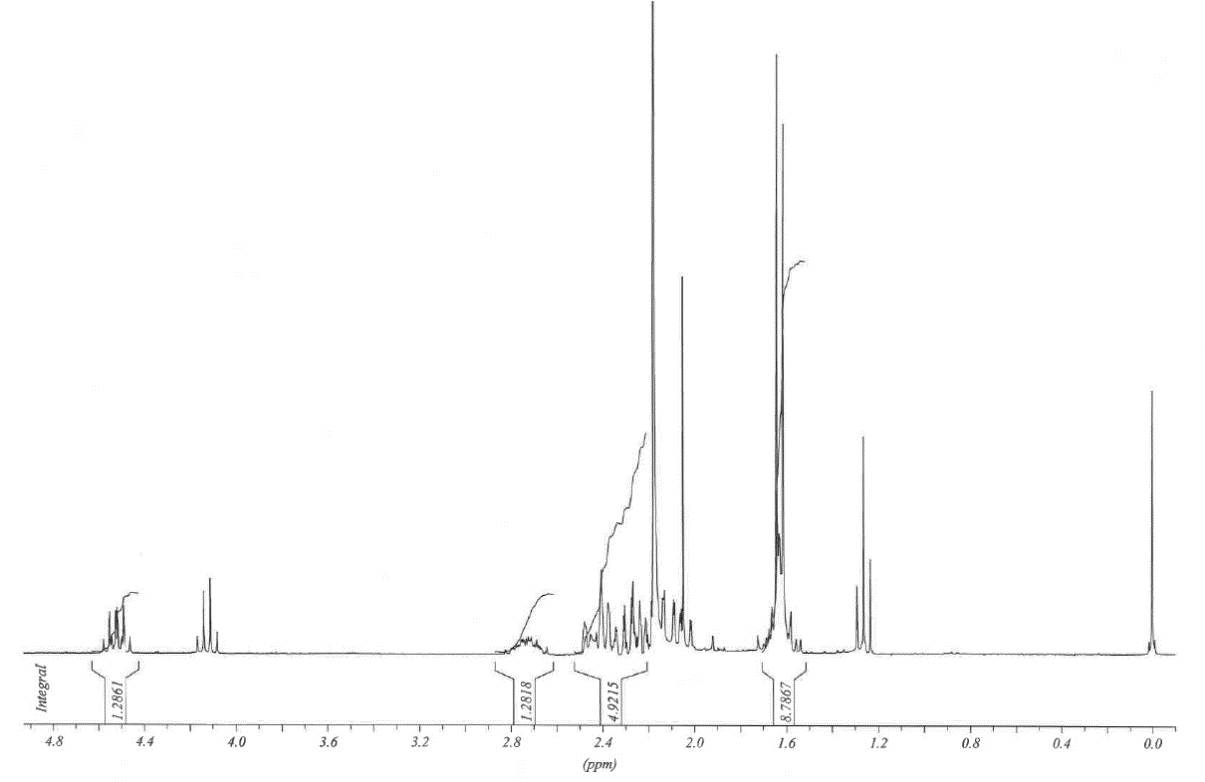


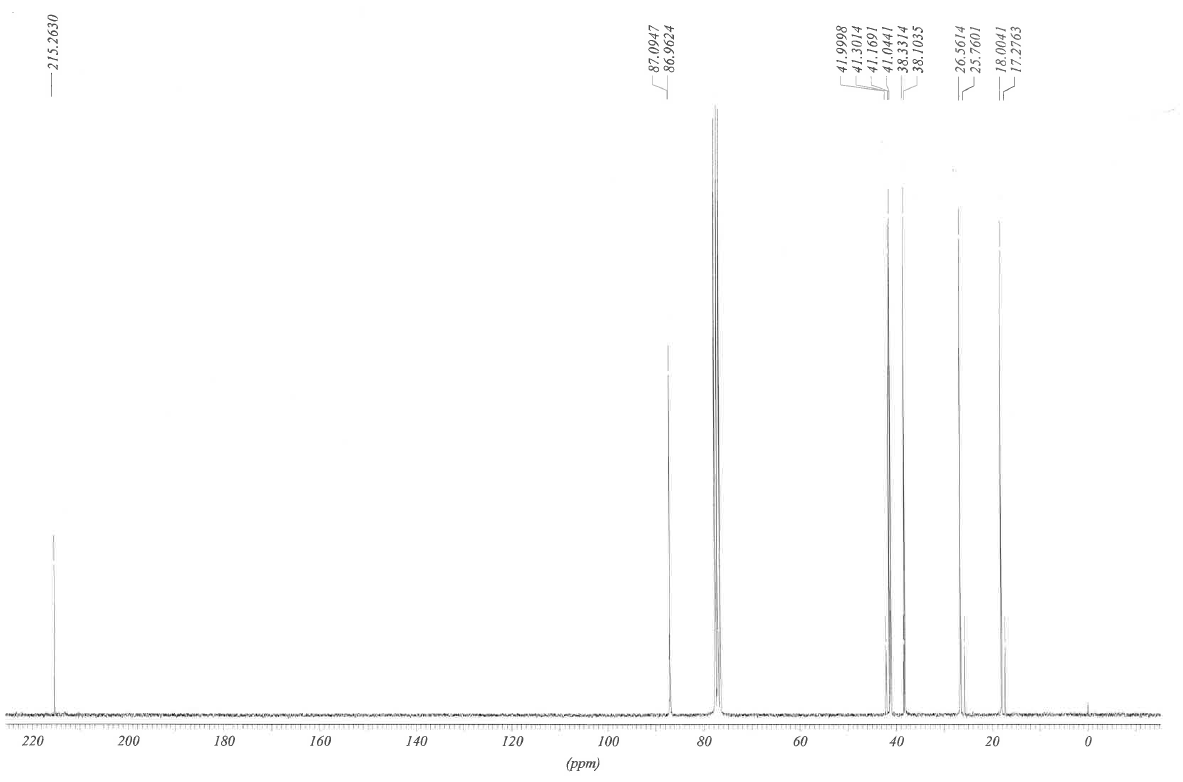


Diastereomer 2 **-** 1H NMR (250 MHz, CDCl3) δ 4.57-4.46 (m, 1H), 2.83-2.64 (m, 1H), 2.49-2.00 (m, 6H), 1.64 (d, 3H, *J* = 6.72 Hz).  13C NMR (62.9 MHz, CDCl3) δ 215.3, 87.1, 42.0, 41.2, 38.3, 25.8, 17.3.


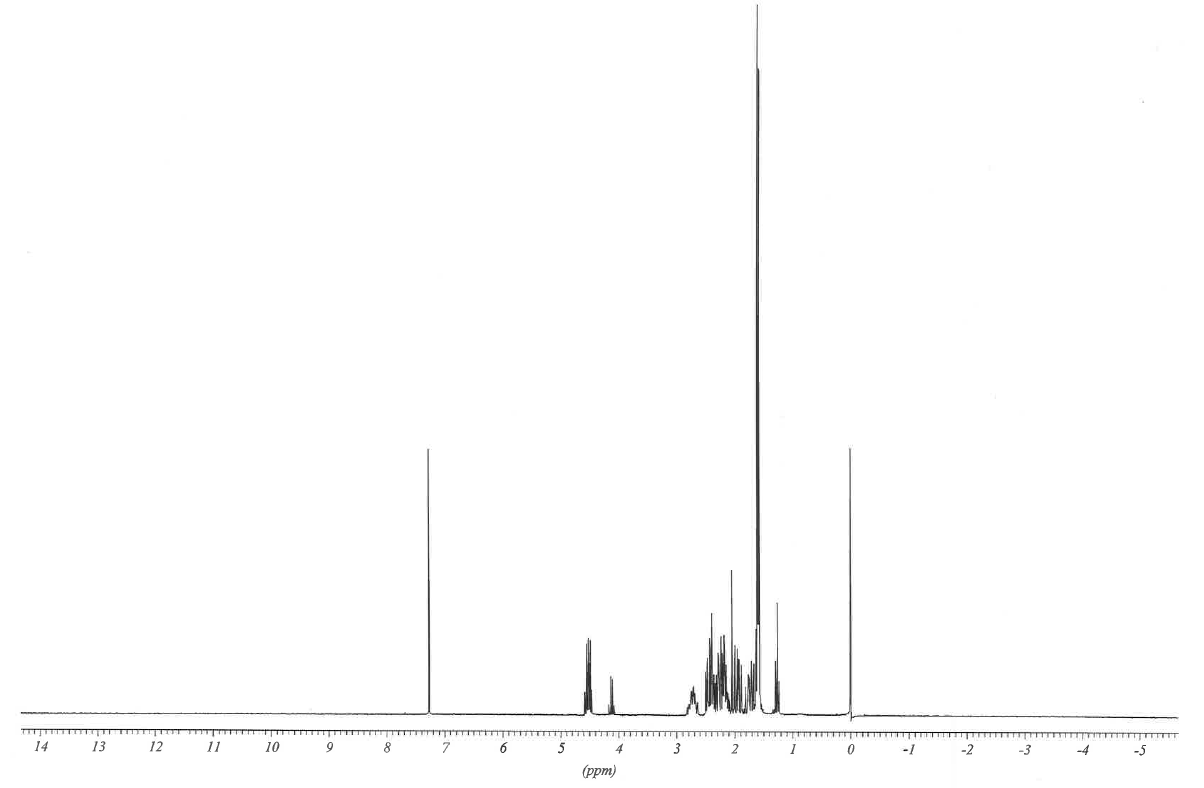


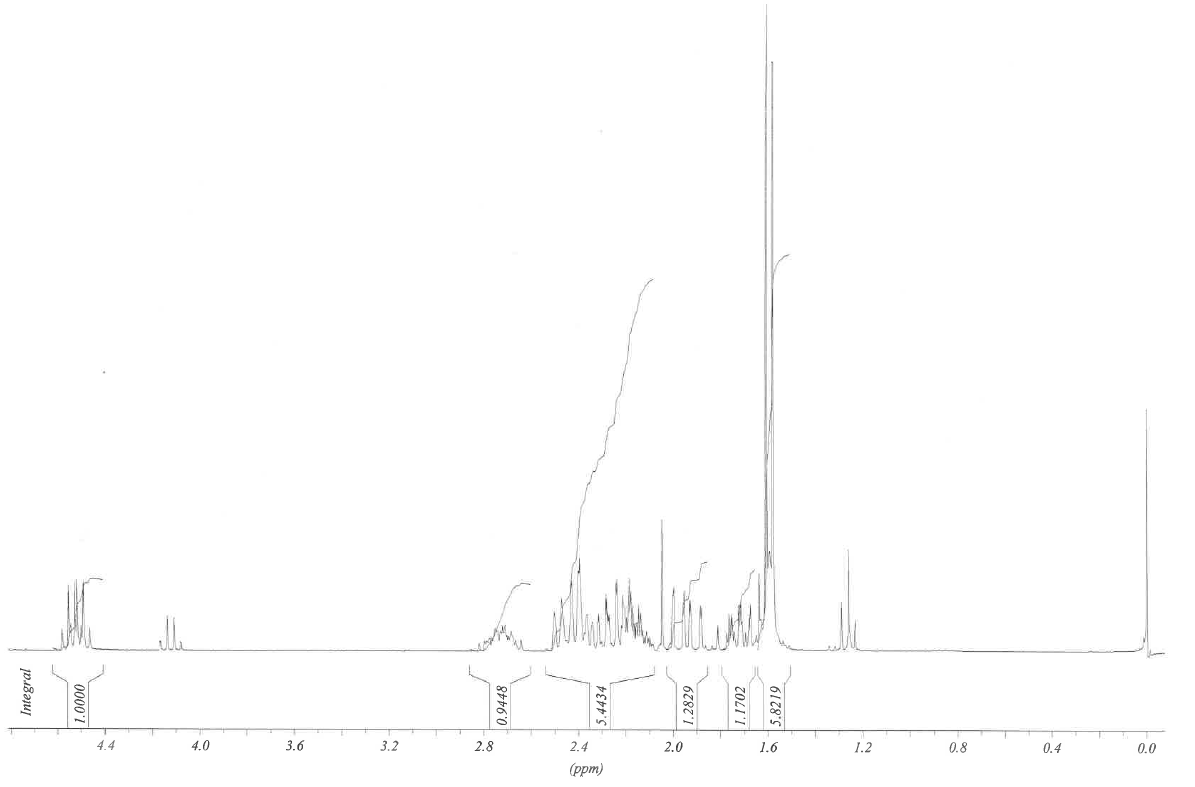


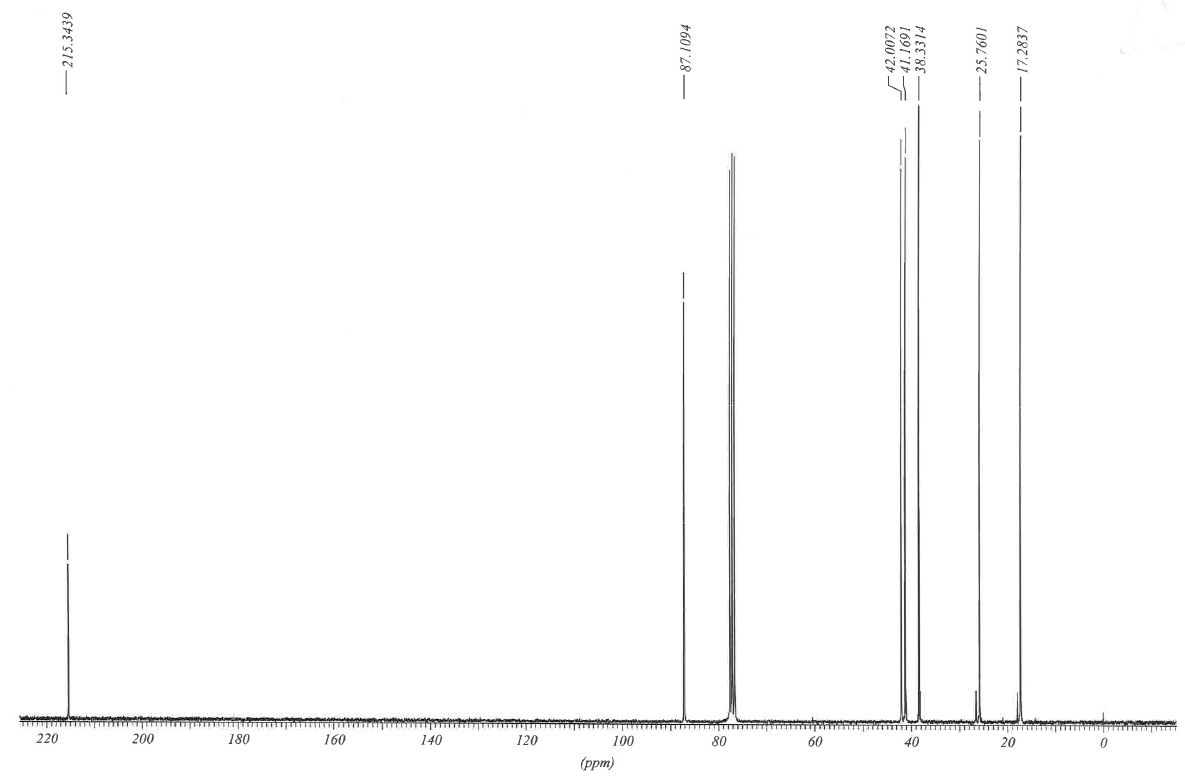


**8j. 3-(1-nitropropyl)cyclopentanone.** Pale yellow Liquid, IR (neat): νmax 2974, 2939, 2916, 2883, 1747, 1556, 1539 cm-1;

Diastereomer 1 - 1H NMR (250 MHz, CDCl3) δ 4.42-4.30 (dt, 1H, *J* = 9.77 Hz and *J* = 3.66 Hz), 2.83-2.64 (m, 1H), 2.48-1.83 (m, 6H), 1.73-1.52 (m, 2H), 1.01 (t, 3H, *J* = 7.32 Hz). 13C NMR (62.9 MHz, CDCl3) δ 215.4, 94.2, 41.4, 40.3, 38.0, 26.6, 26.0, 10.2.

Diastereomer 2 - 1H NMR (250 MHz, CDCl3) δ 4.40-4.28 (dt, 1H, *J* = 9.76 Hz and *J* = 3.67 Hz), 2.82-2.62 (m, 1H), 2.53-1.62 (m, 8H), 1.00 (t, *J* = 7.33 Hz, 3H). 13C NMR (62.9 MHz, CDCl3) δ 215.3, 94.1, 41.8, 40.1, 38.3, 26.0, 25.0, 10.1.

**8k. 4-nitropentanenitrile.** Yellow Liquid, IR (neat): νmax 2995, 2945, 2899, 2249, 1556 cm-1; 1H NMR (250 MHz, CDCl3) δ 4.78-4.64 (m, 1H), 2.53-2.31 (m, 3H), 2.17-2.03 (m, 1H), 1.64 (d, 3H, *J* = 6.72 Hz), 13C NMR (62.9 MHz, CDCl3) δ 117.8, 81.4, 30.3, 19.1, 14.3.


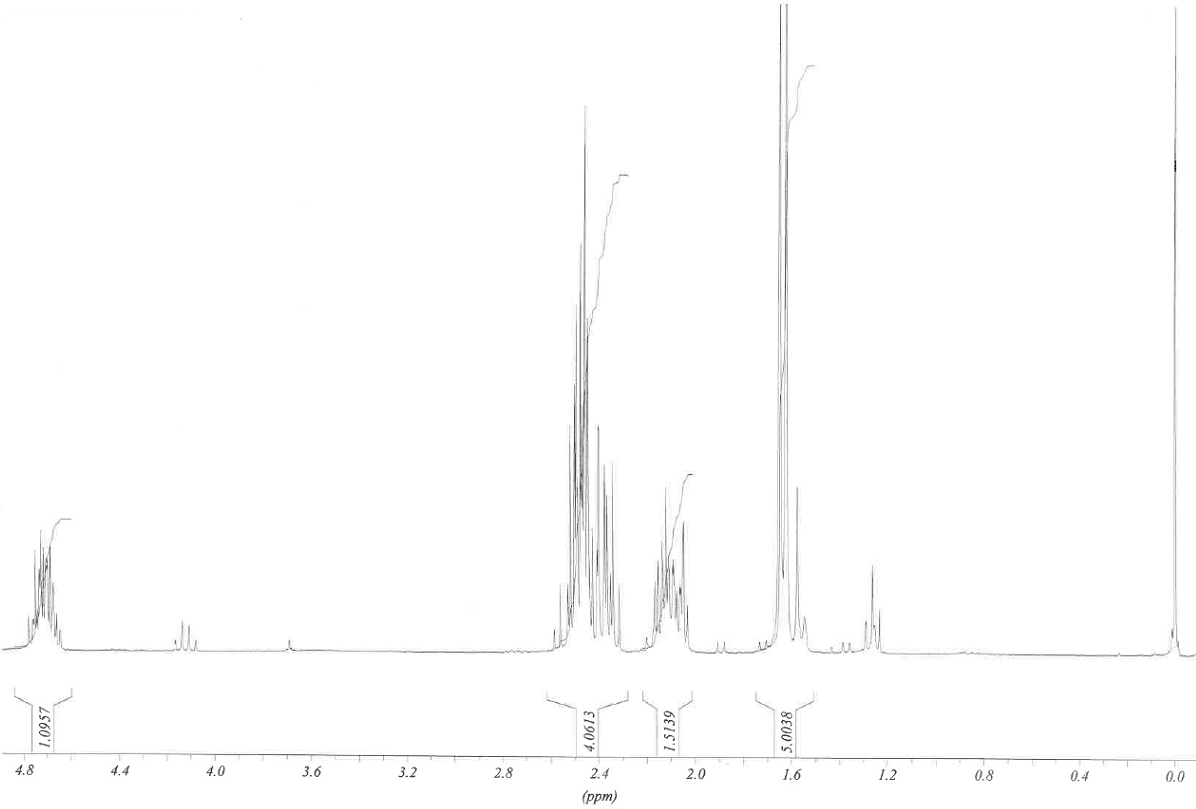


**8l. 4-methyl-4-nitropentanenitrile.** Pale Yellow Liquid, IR (neat): νmax 2993, 2943, 2875, 2250, 1533 cm-1; 1H NMR (250 MHz, CDCl3) δ 2.46-2.28 (m, 4H), 1.67 (s, 6H), 13C NMR (62.9 MHz, CDCl3) δ 118.4, 86.7, 35.8, 25.7, 12.0.


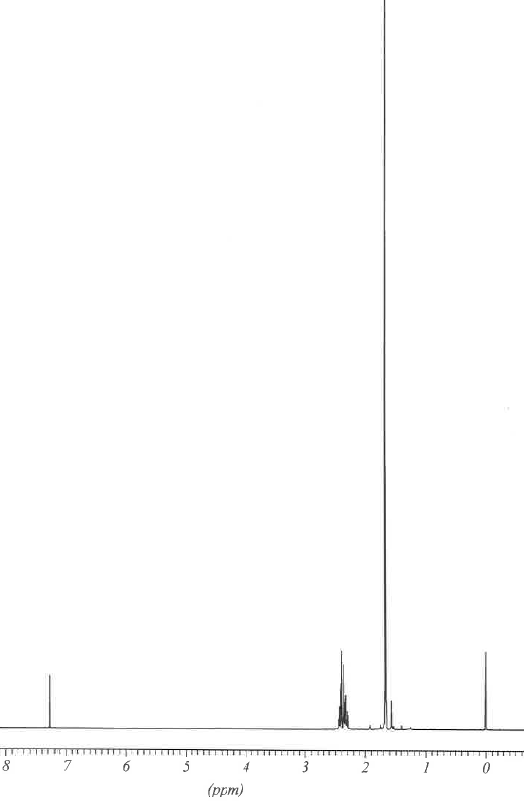


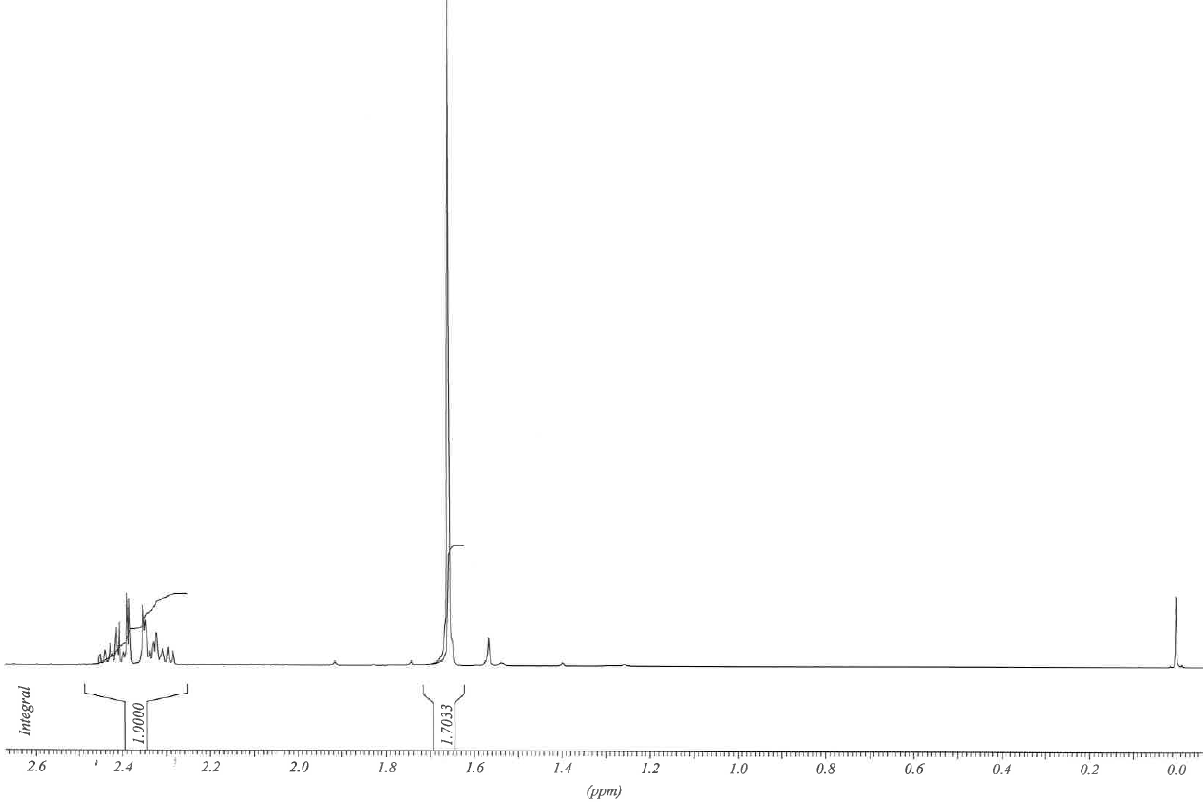


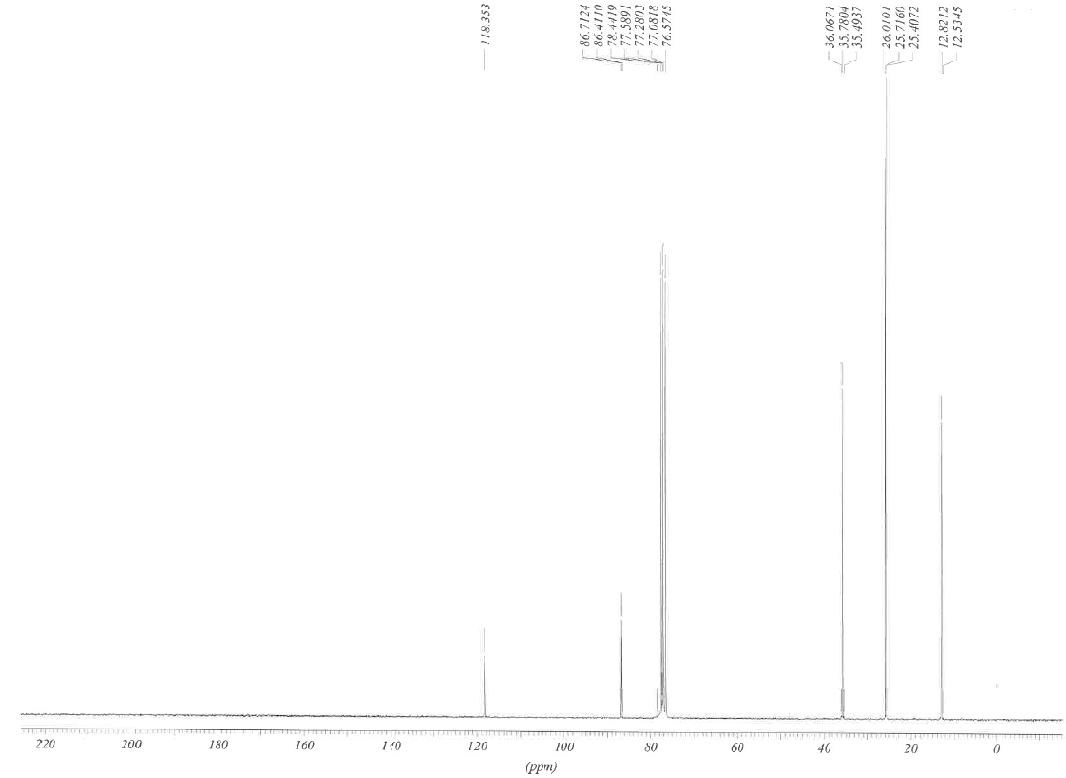


**8m. 4-nitrohexanenitrile.** Yellow Liquid, IR (neat): νmax 2976, 2941, 2883, 2249, 1546 cm-1; 1H NMR (250 MHz, CDCl3) δ 4.62-4.48 (m, 1H), 2.57-2.28 (m, 3H), 2.19-1.98 (m, 1H), 1.97-1.78 (m, 2H), 1.02 (t, 3H, *J* = 7.33 Hz). 13C NMR (62.9 MHz, CDCl3) δ 117.8, 88.0, 28.8, 27.0, 14.3, 10.0.


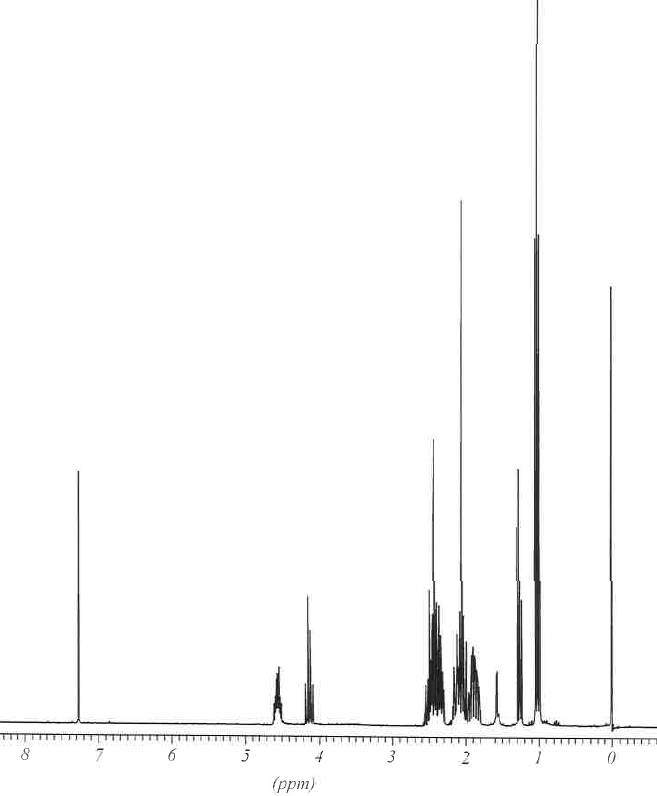


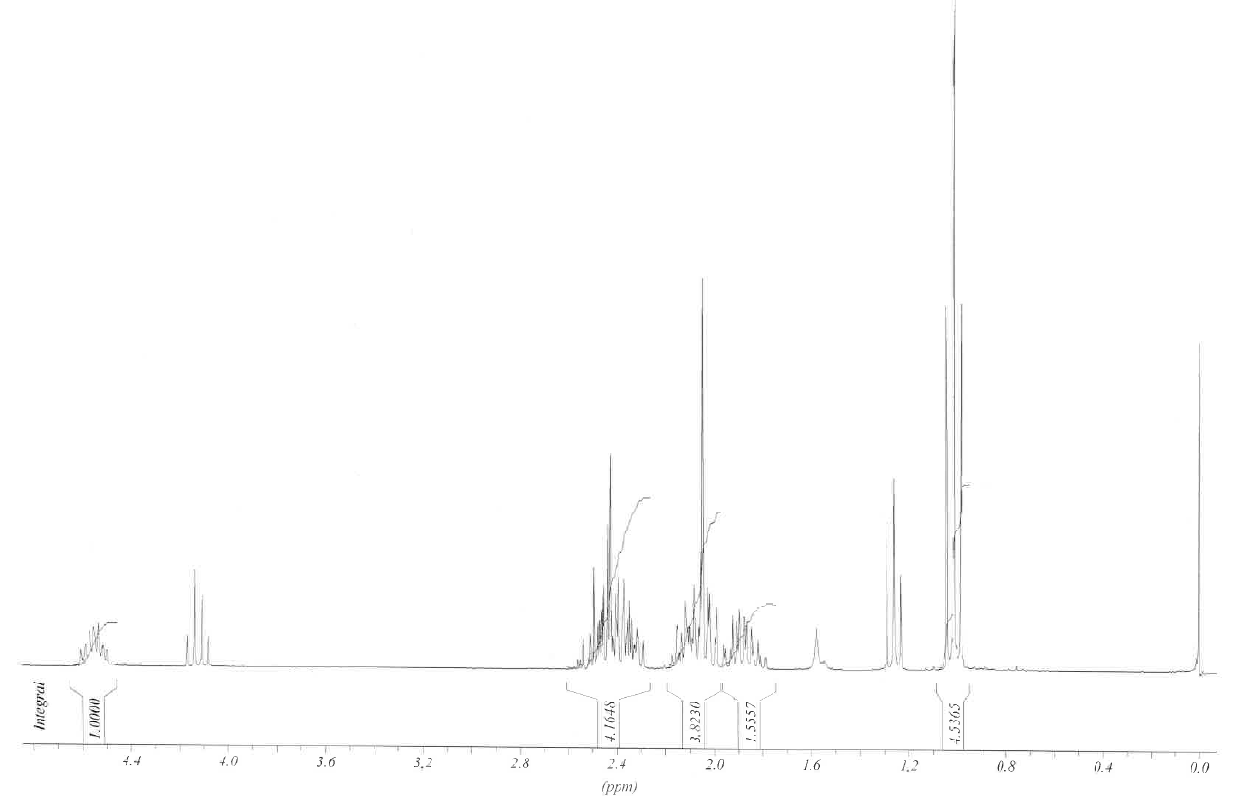


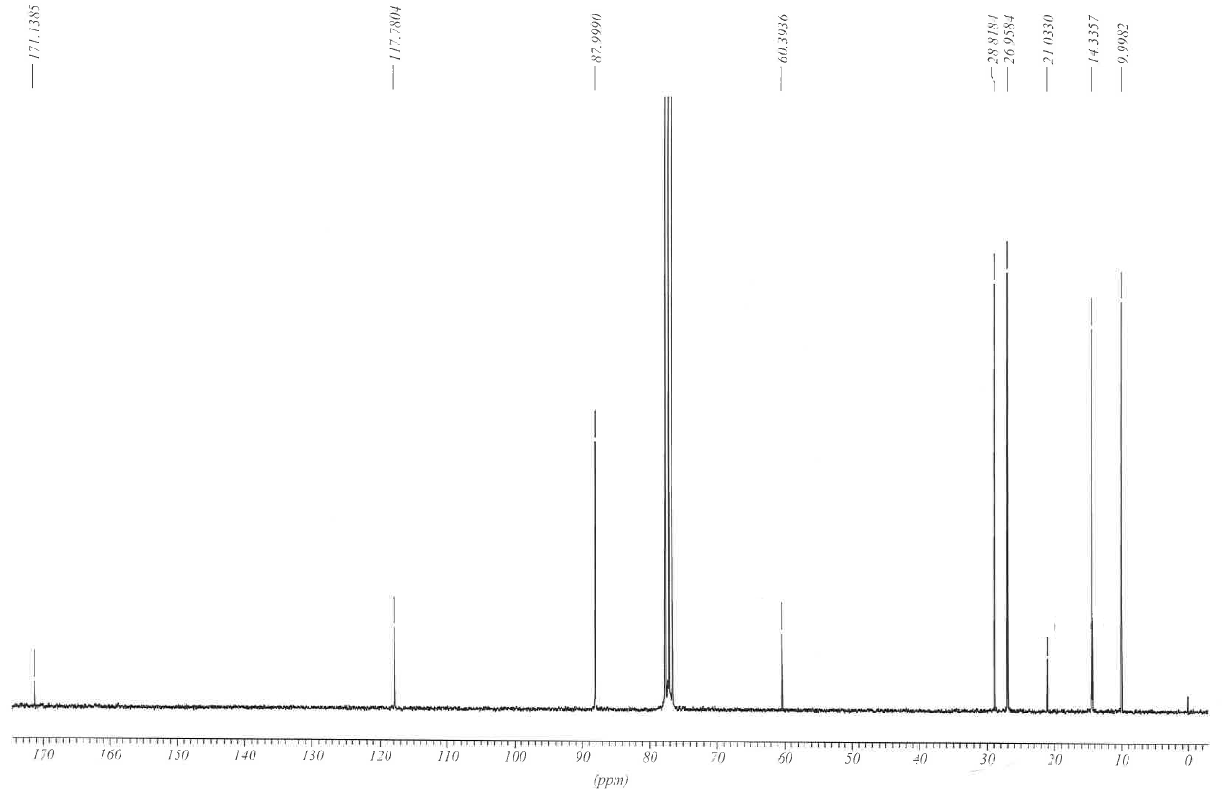


**8n. Methyl 3-methyl-4-nitropentanoate.** Colourless Liquid, IR (neat): νmax 2978, 2954, 1732, 1548 cm-1; 1H NMR (250 MHz, CDCl3) δ 4.69-4.53 (m, 1H), 3.72-3.69 (2s, 3H), 2.72-2.18 (m, 3H), 1.55-1.48 (2d, 3H, *J* = 6.71 Hz), 1.05-1.00 (2d, 3H, *J* = 6.71 Hz). 13C NMR (62.9 MHz, CDCl3) δ 172.1, 171.9, 86.5, 86.4, 51.8, 37.3, 37.1, 34.5, 34.4, 16.3, 15.6, 15.5, 15.4.


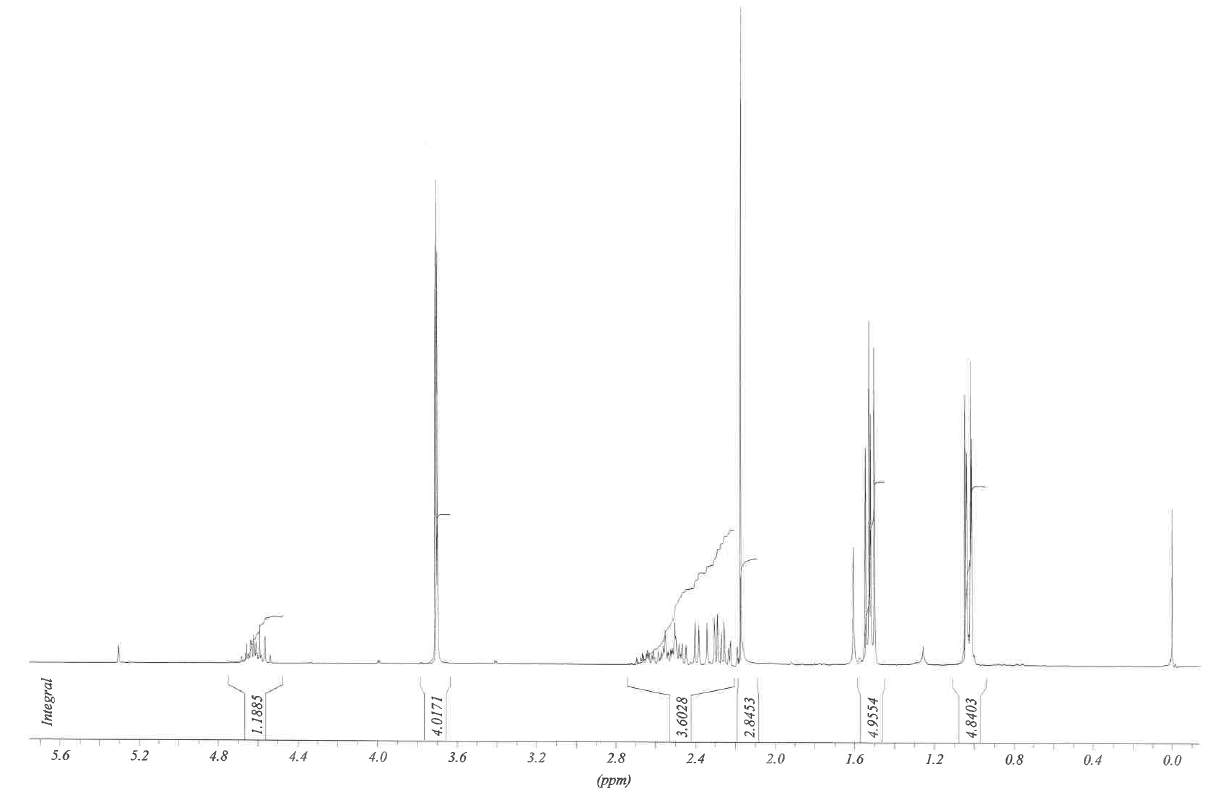


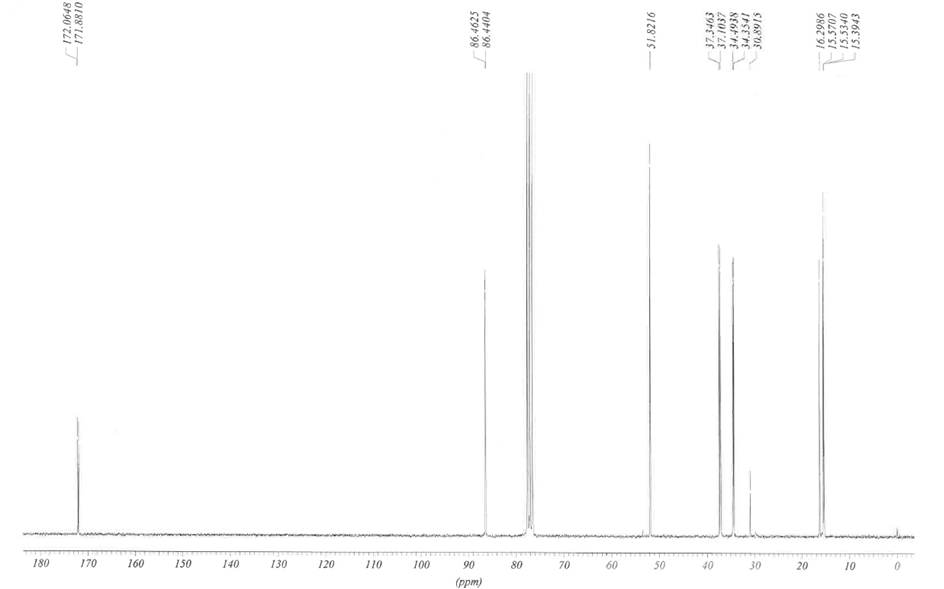


**8o. Methyl 3-methyl-4-nitrohexanoate.** Colourless Liquid, IR (neat): νmax 2976, 2954, 2883, 1730, 1552, 1544 cm-1; 1H NMR (250 MHz, CDCl3) δ 4.50-4.34 (m, 1H), 3.70 (2s, 3H), 2.61-2.41 (m, 2H), 2.35-2.16 (m, 1H), 2.15-1.92 (m, 1H), 1.91-1.68 (m, 1H), 1.04 (2d, 3H, *J* = 6.71 Hz), 0.97 (t, 3H, *J* = 7.32 Hz). 13C NMR (62.9 MHz, CDCl3) δ 172.1, 94.1, 93.6, 51.8, 51.7, 37.5, 37.1, 33.6, 33.4, 24.2, 24.1, 16.3, 15.5, 10.5, 10.4.


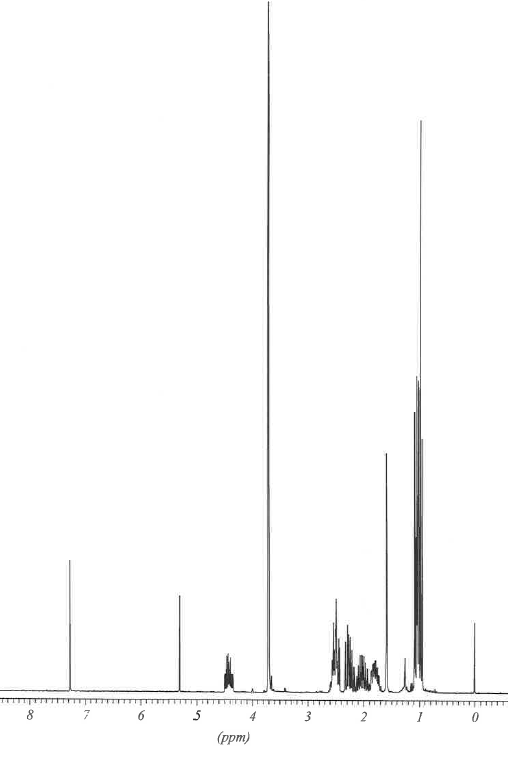


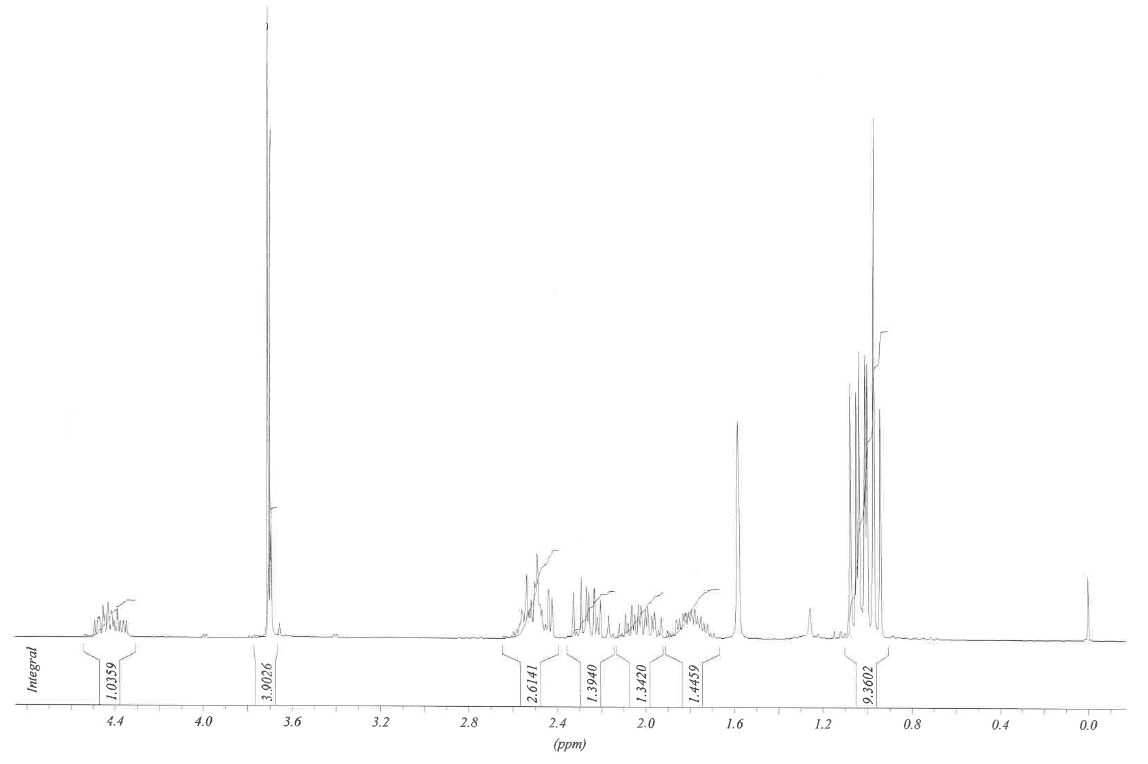


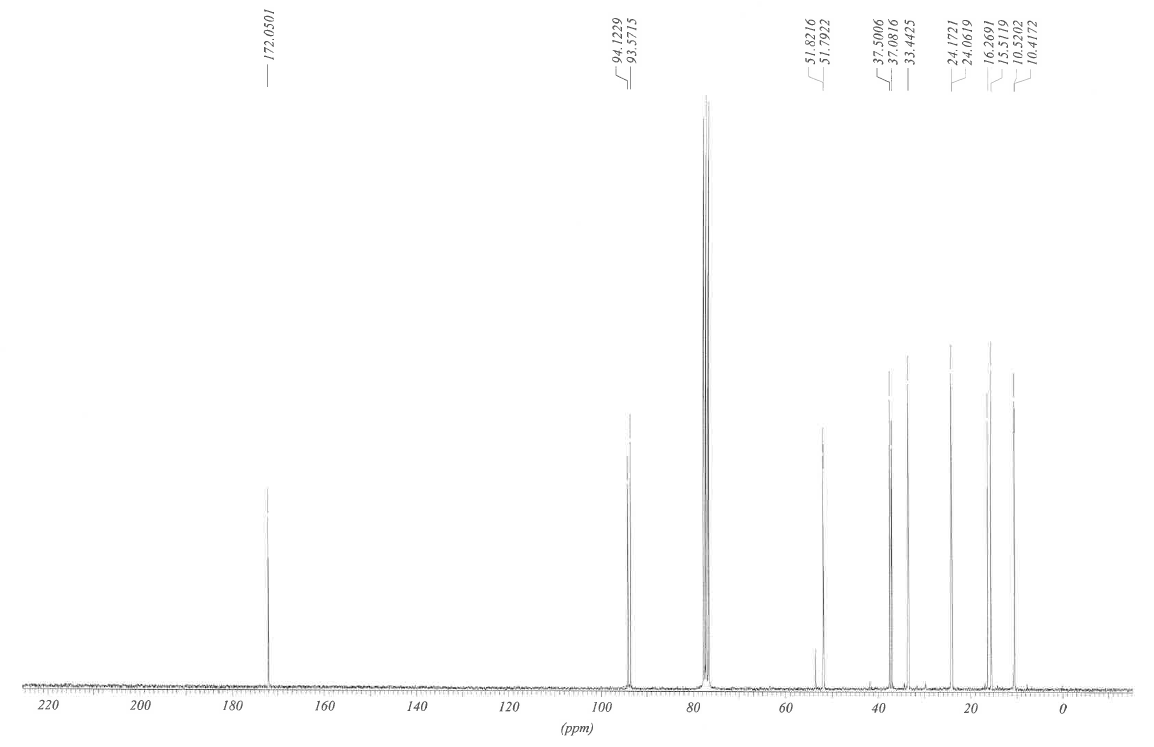


**8p. Dimethyl-2-nitropentanedioate.** Yellow Liquid. IR (neat): νmax 2960, 1736, 1560, 1535 cm-1; 1H NMR (250 MHz, CDCl3) δ 5.33 (m, 1H), 3.85 (s, 3H), 3.71 (s, 3H), 2.60-2.35 (m, 4H). 13C NMR (62.9 MHz, CDCl3) δ 171.9, 164.7, 86.6, 53.7, 52.0, 29.4, 25.4.


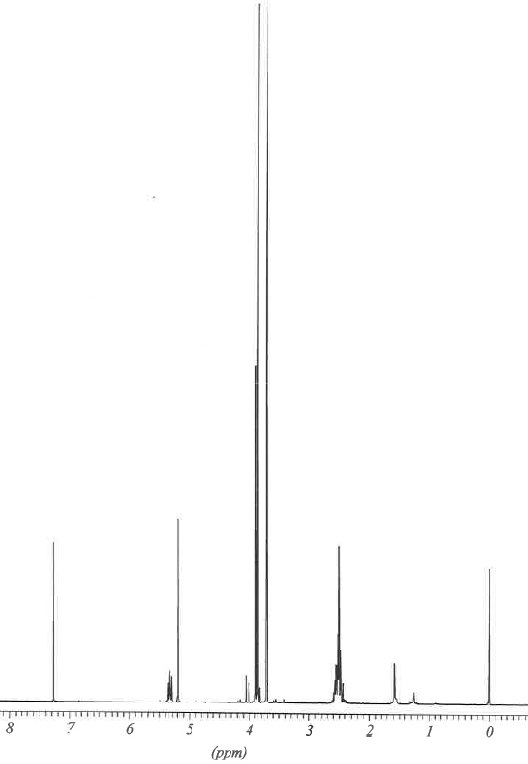


**
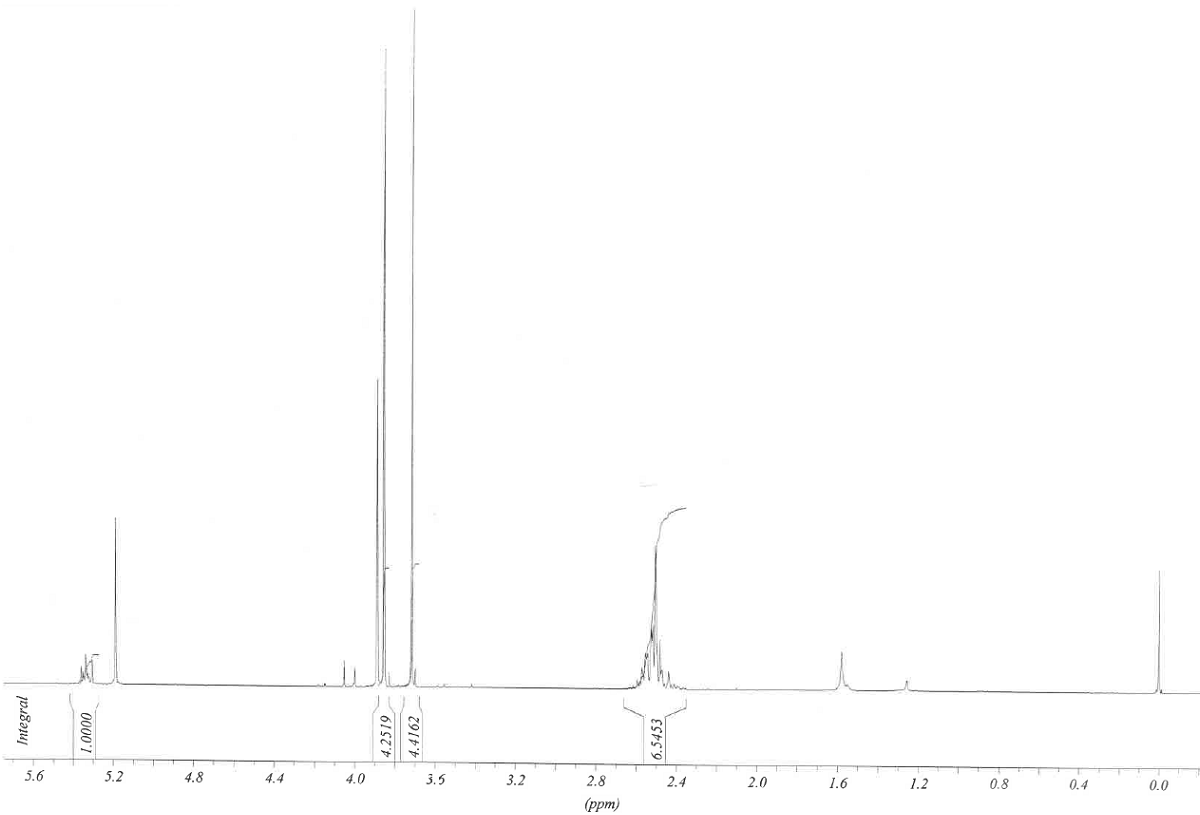
**

**
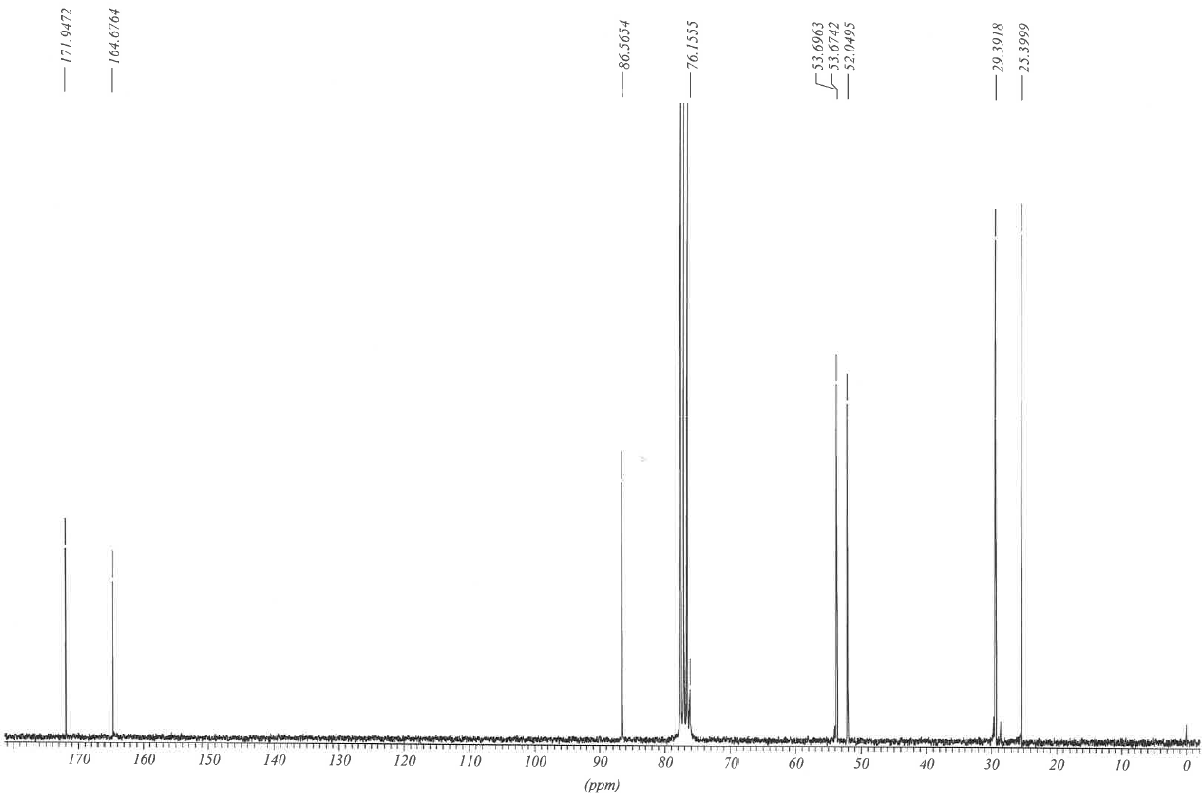
**

**8q. 5-nitro-4-phenyl-2-hexanone.** Pale Yellow Liquid. IR (neat): νmax 3062, 3032, 2941, 2902, 1714, 1556, 1541 cm-1; 1H NMR (250 MHz, CDCl3) δ 7.38-7.16 (m, 5H), 4.83-4.70 (dq, 1H, *J* = 6.72 Hz and 9.76 Hz), 3.77-3.65 (dt, 1H, *J* = 9.76 Hz and 4.28 Hz) 3.04-2.90 (dd, 1H, *J* = 9.77 Hz and 17.09 Hz), 2.80-2.66 (dd, 1H, *J* = 4.27 Hz and 17.09 Hz), 2.02 (s, 3H), 1.32 (d, 3H, *J* = 6.71 Hz). 13C NMR (62.9 MHz, CDCl3) δ 204.9, 138.4, 129.1, 128.2, 127.9, 46.3, 45.4, 30.4, 17.8.


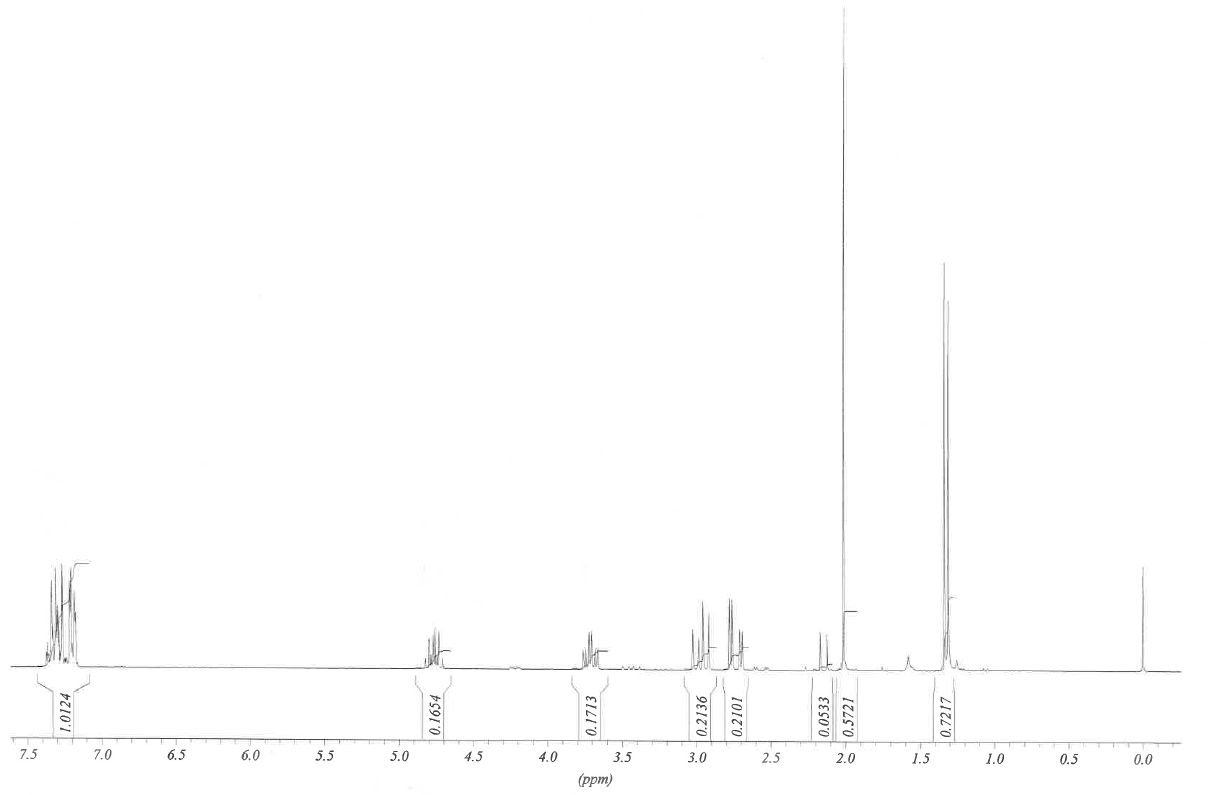

Supplement: f1 [file 6267036.f1.docx]
